# Supplementary material for: Synthesis of new unnatural Nα-Fmoc pyrimidin-4-one amino acids: use of the p-benzyloxybenzyloxy group as a pyrimidinone masking group
Source: Royal Society of Chemistry journal article supplement (doi:10.1039/c4ob02235a), 2014-11-06

## Electronic Supplementary Information

### *Synthesis of new unnatural $N^\alpha$ -Fmoc pyrimidin-4-one amino acids: use of *p*-benzyloxybenzyloxy group as a pyrimidinone masking group*

Abdellatif ElMarrouni, and Montserrat Heras\*

*Department of Chemistry, Faculty of Sciences, University of Girona, Campus de Montilivi, E-17071, Girona, Spain.*

[montserrat.heras@udg.edu](mailto:montserrat.heras@udg.edu)

#### Table of contents

|                                                                          |     |
|--------------------------------------------------------------------------|-----|
| Instruments                                                              | S2  |
| Analysis of optical purity of pyrimidin-4-yl amino esters <b>16</b>      | S2  |
| Synthesis of Dipeptides <b>16</b> . General procedure                    | S3  |
| HPLC of dipeptide ( <i>S/R,S</i> )- <b>16a</b>                           | S4  |
| HPLC of dipeptide ( <i>S,S</i> )- <b>16a</b>                             | S4  |
| ESI-MS of dipeptide ( <i>S,S</i> )- <b>16a</b>                           | S5  |
| HPLC of dipeptide ( <i>S/R,S</i> )- <b>16b</b>                           | S6  |
| HPLC of dipeptide ( <i>S,S</i> )- <b>16b</b>                             | S6  |
| ESI-MS of dipeptide ( <i>S,S</i> )- <b>16b</b>                           | S7  |
| HPLC of dipeptide ( <i>S/R,S</i> )- <b>16c</b>                           | S8  |
| HPLC of dipeptide ( <i>S,S</i> )- <b>16c</b>                             | S8  |
| ESI-MS of dipeptide ( <i>S,S</i> )- <b>16c</b>                           | S9  |
| <sup>1</sup> H-NMR of compound <b>12</b>                                 | S10 |
| <sup>13</sup> C-NMR and DEPT experiment of compound <b>12</b>            | S11 |
| <sup>1</sup> H-NMR of compound <b>10</b>                                 | S12 |
| <sup>13</sup> C-NMR and DEPT experiment of compound <b>10</b>            | S13 |
| <sup>1</sup> H-NMR of compound <b>8</b>                                  | S14 |
| <sup>13</sup> C-NMR and DEPT experiment of compound <b>8</b>             | S15 |
| <sup>1</sup> H-NMR of compound <b>13</b>                                 | S16 |
| <sup>13</sup> C-NMR and DEPT experiment of compound <b>13</b>            | S17 |
| <sup>1</sup> H-NMR of compound <b>9a</b>                                 | S18 |
| <sup>13</sup> C-NMR and DEPT experiment of compound <b>9a</b>            | S19 |
| <sup>1</sup> H-NMR of compound <b>9b</b>                                 | S20 |
| <sup>13</sup> C-NMR and DEPT experiment of compound <b>9b</b>            | S21 |
| <sup>1</sup> H-NMR of compound <b>9c</b>                                 | S22 |
| Variable temperature experiment <sup>1</sup> H-NMR of compound <b>9c</b> | S23 |
| <sup>13</sup> C-NMR and DEPT experiment of compound <b>9c</b>            | S24 |
| <sup>1</sup> H-NMR of compound <b>3a</b>                                 | S25 |
| <sup>13</sup> C-NMR and DEPT experiment of compound <b>3a</b>            | S26 |
| <sup>1</sup> H-NMR of compound <b>3b</b>                                 | S27 |
| <sup>13</sup> C-NMR and DEPT experiment of compound <b>3b</b>            | S28 |
| <sup>1</sup> H-NMR of compound <b>3c</b>                                 | S29 |
| <sup>13</sup> C-NMR and DEPT experiment of compound <b>3c</b>            | S30 |

## Instruments

High performance liquid chromatography (HPLC) was performed on a Dionex liquid chromatography instrument. Detection was carried out at 220 nm. Analysis was performed using a Kromasil 100 C<sub>18</sub> (40 mm x 4.6 mm, 3.5 µm particle size) reverse-phase column with a 2-100% B linear gradient over 17 min at a flow rate of 1 mL min<sup>-1</sup>. Solvent A was 0.1% aqueous TFA, and solvent B was 0.1% TFA in CH<sub>3</sub>CN. ESI-MS analyses were performed with an Esquire 6000 ESI ion Trap LC/MS (Bruker Daltonics) instrument equipped with an electrospray ion source. The instrument was operated in the positive ESI(+) ion mode.

### Analysis of optical purity of *N*<sup>α</sup>-Boc-pyrimidin-4-one amino esters 9 and amino acids 3

The optical purity of compounds **9** was verified by coupling with both racemic phenylalanine and L-phenylalanine in order to measure the degree of racemisation by HPLC. Thus, samples of *N*<sup>α</sup>-Boc amino esters **9** (1 equivalent) were deprotected using lithium hydroxide (2.5 equivalents) to give amino acids **15** in near quantitative yield. These compounds were first coupled to a resin bound racemic phenylalanine using standard protocols for solid-phase peptide synthesis following Fmoc/*tert*-butyl strategy. After cleavage from the resin, the HPLC analyses of the resulting dipeptides (*S/R,S*)-**16** showed the formation of two diastereoisomers. Dipeptides **16** were then synthesized equally by coupling *N*<sup>α</sup>-Boc amino acids **15** to a resin bound to L-phenylalanine. When no reasonable racemisation occurred during the synthesis of **9**, HPLC analysis of (*S,S*)-**16** showed the formation of one single diastereoisomer (Scheme 1). Analogously, the optical purity of *N*<sup>α</sup>-Fmoc amino acids **3** were confirmed by coupling with both racemic phenylalanine and L-phenylalanine. In this case, Fmoc-deprotection step, by treatment with piperidine, was required before the final cleavage of the peptide from the resin (Scheme 1).

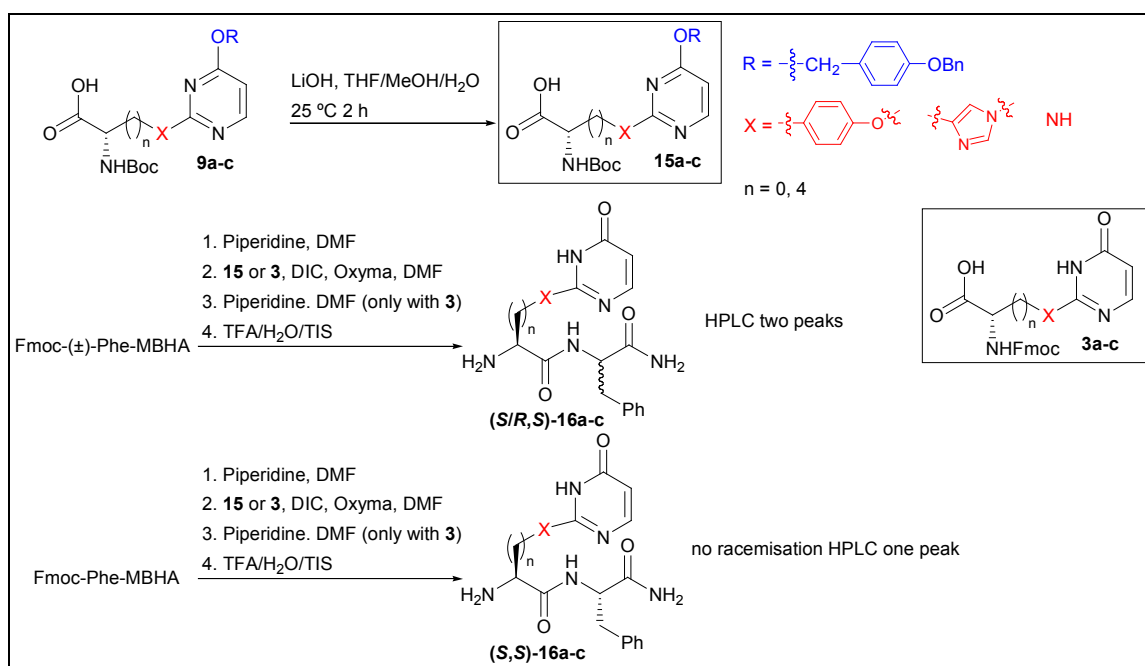

**Scheme 1.** Solid-phase synthesis of dipeptides **16a-c**.

### Synthesis of Dipeptides **16**. General procedure

Dipeptides **16** were prepared manually by solid-phase method using Fmoc-Rink-MBHA resin (0.56 mmol/g) as solid support following standard Fmoc-strategy. Fmoc group was removed with 30% piperidine in DMF (2 min + 10 min). Coupling of amino acids were mediated by *N,N'*-diisopropylcarbodiimide DIC (4 equiv) and 2-cyano-2-(hydroxyimino)acetate (Oxyma Pure) (4 equiv) in DMF at room temperature for 1-3 h. The completion of the coupling reactions was checked by the Kaiser test.<sup>1</sup> After each coupling and deprotection step, the resin was washed with DMF (6 x 1 min), and CH<sub>2</sub>Cl<sub>2</sub> (3 x 1 min), and air dried. The Fmoc-Rink-MBHA resin (10 mg) was placed into a plastic syringe fitted with a polypropylene frit, and the Fmoc protecting group was removed followed by coupling with Fmoc-Phe-OH. Then, the Fmoc protecting group was removed again and the resin was treated with pyrimidinyl amino acids **15** or *N*<sup>α</sup>-Fmoc amino acids **3** under coupling conditions. In the case of amino acids **3** the Fmoc group was removed before the final cleavage of the peptide. The resulting dipeptides were cleaved from resin by treatment with TFA/H<sub>2</sub>O/TIS (95:2.5:2.5) for 2 h. Then, the solvents were evaporated to dryness and the crude dipeptides **16** were dissolved in H<sub>2</sub>O, lyophilized, analysed by HPLC, and characterized by mass spectrometry.

---

<sup>1</sup> Kaiser, E.; Colescott, R. L.; Bossinger, C. D.; Cook, P. I. *Anal. Biochem.* **1970**, *34*, 595-598

## HPLC of dipeptide (*S/R,S*)-16a

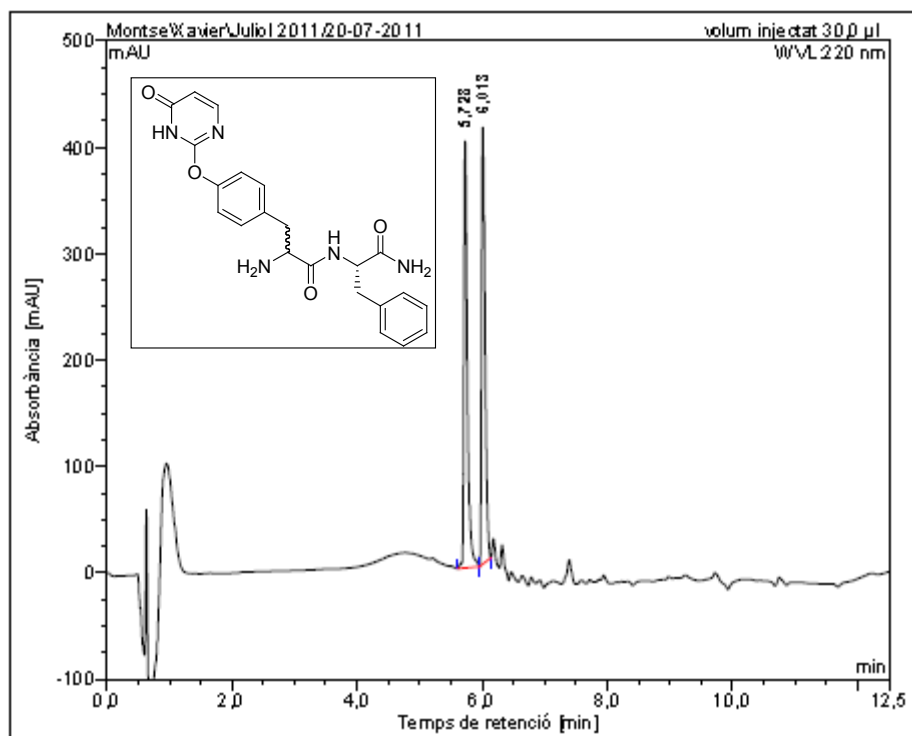

## HPLC of dipeptide (*S,S*)-16a

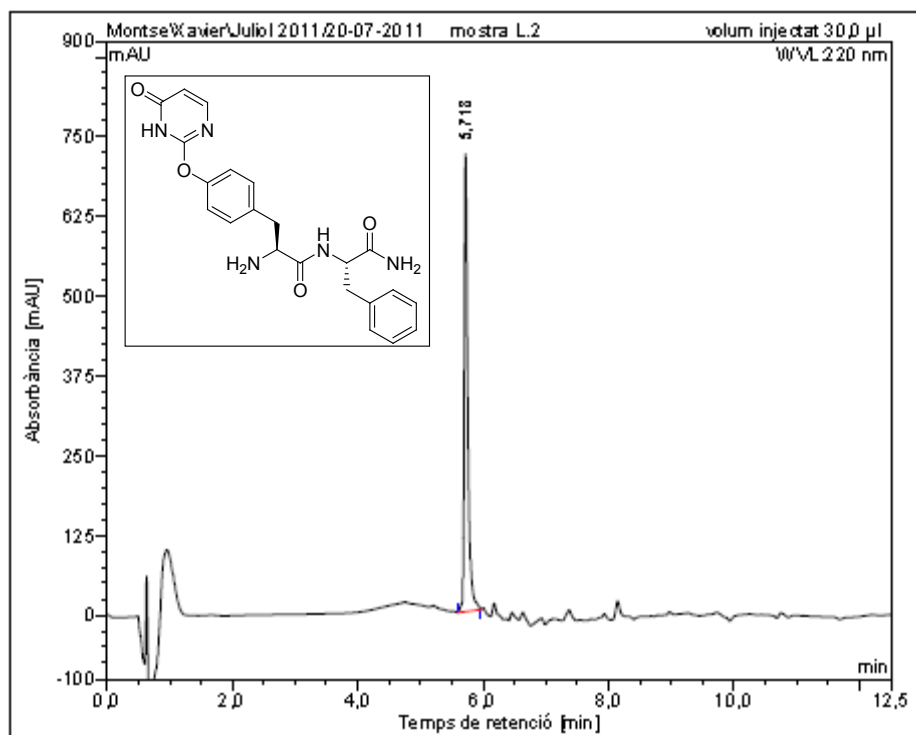

## ESI-MS of dipeptide (*S,S*)-16a

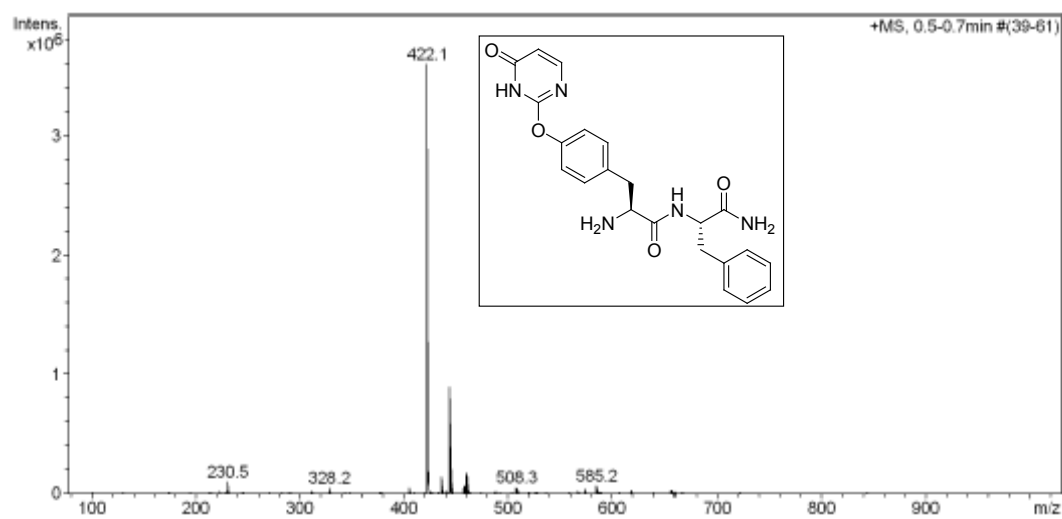

## HPLC of dipeptide (*S/R,S*)-16b

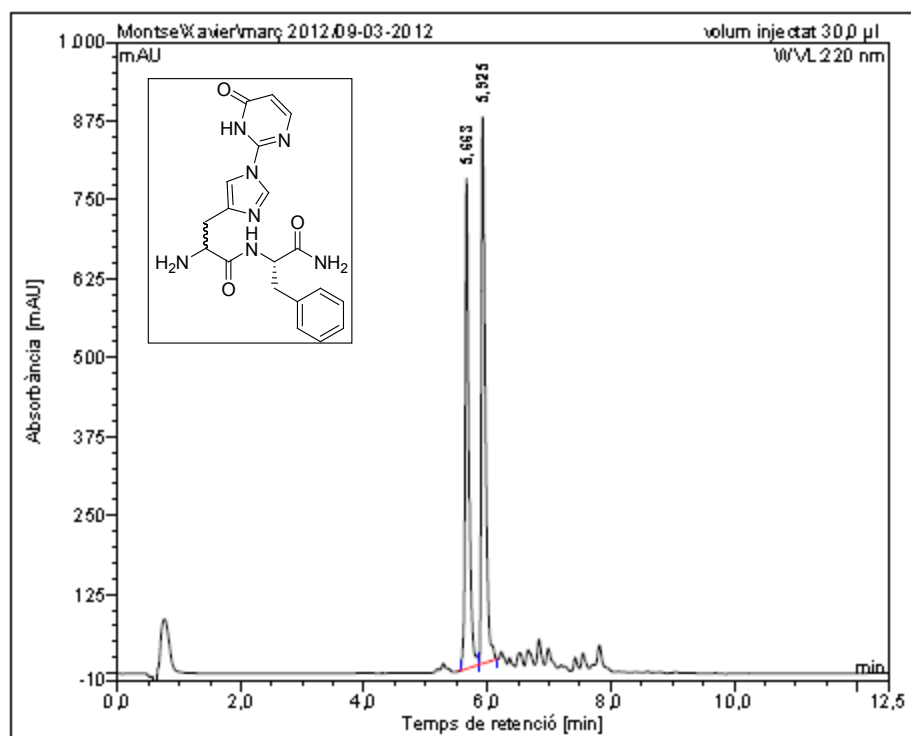

## HPLC of dipeptide (*S,S*)-16b

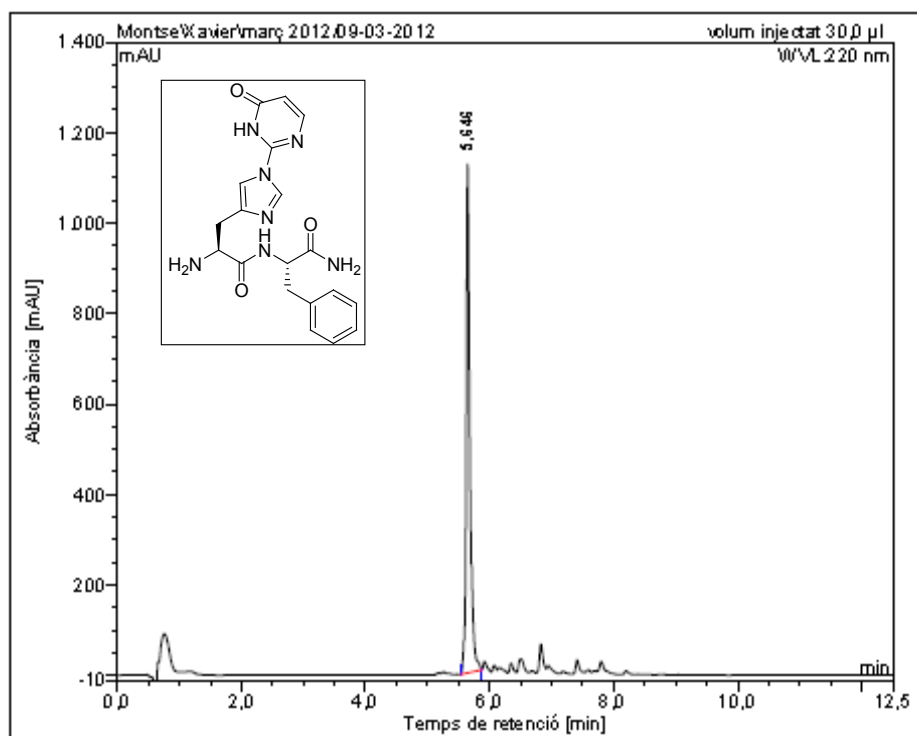

## ESI-MS of dipeptide (*S,S*)-16b

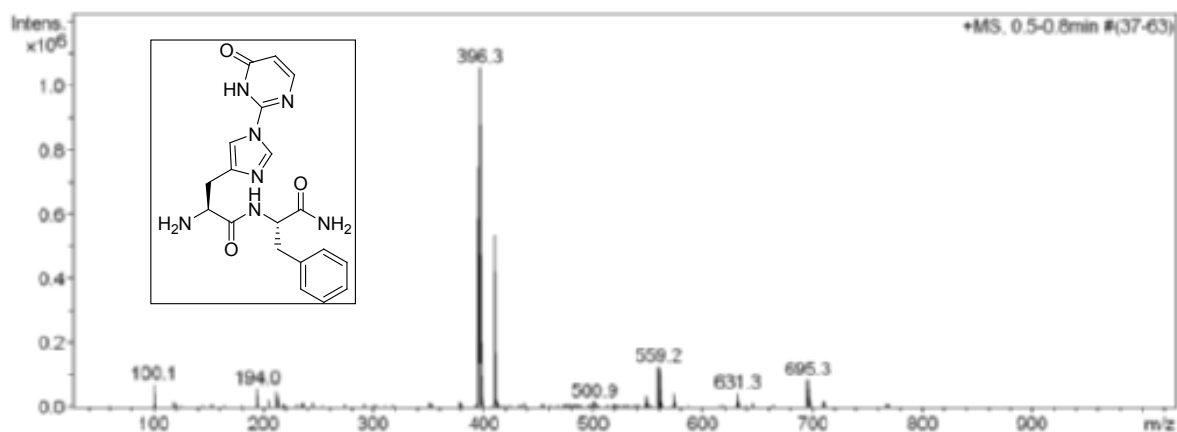

## HPLC of dipeptide (*S/R,S*)-16c

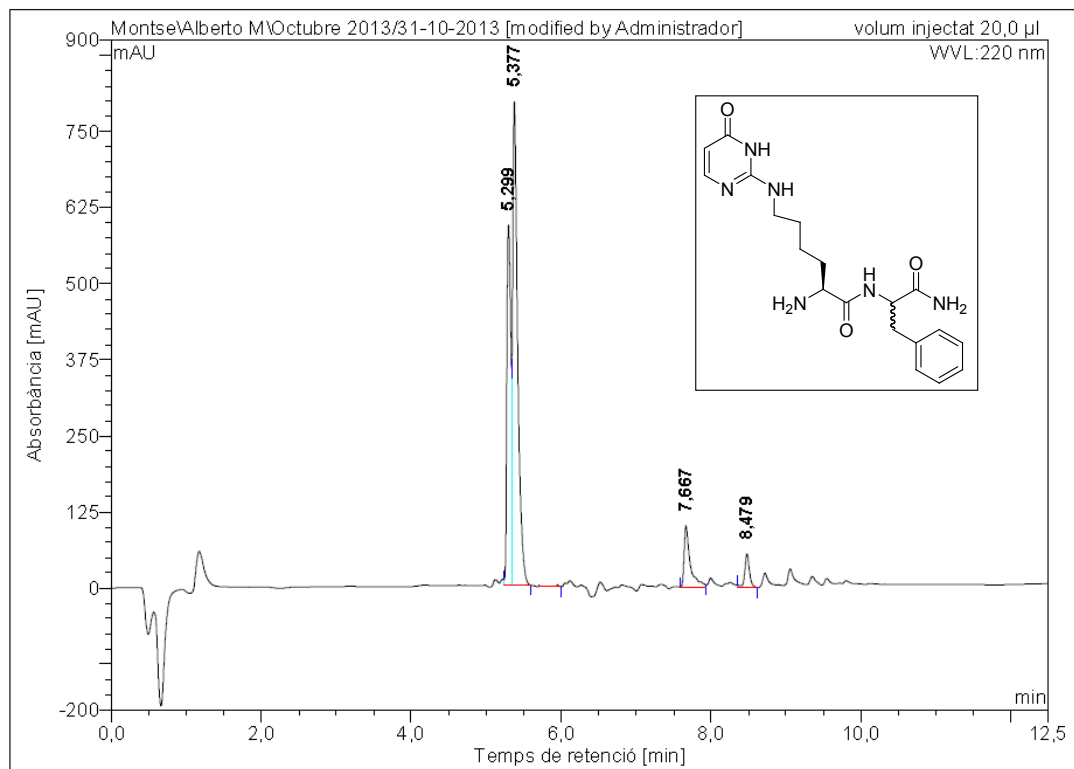

## HPLC of dipeptide (*S,S*)-16c

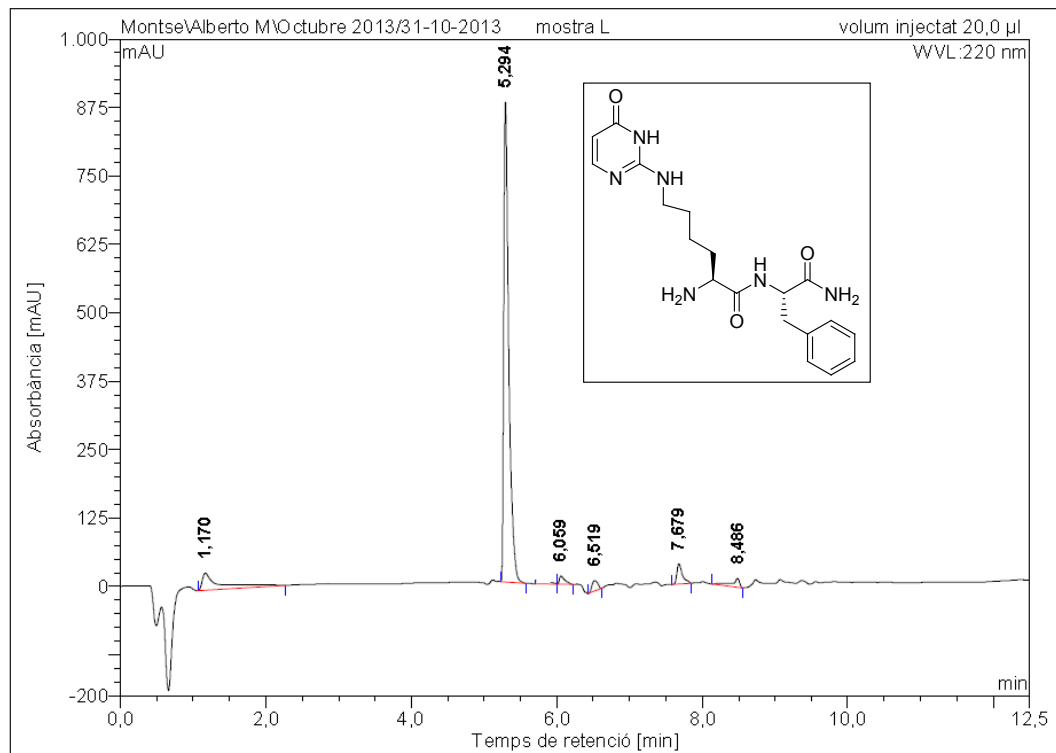



## ESI-MS of dipeptide (*S/R,S*)-16c

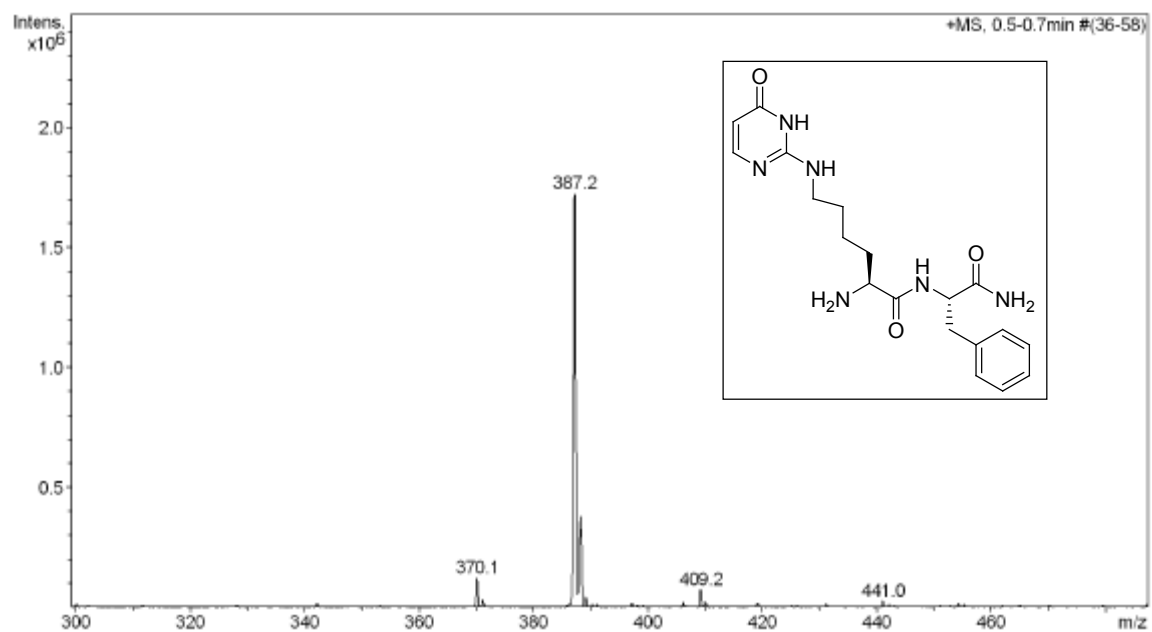

**<sup>1</sup>H-NMR of compound 12**

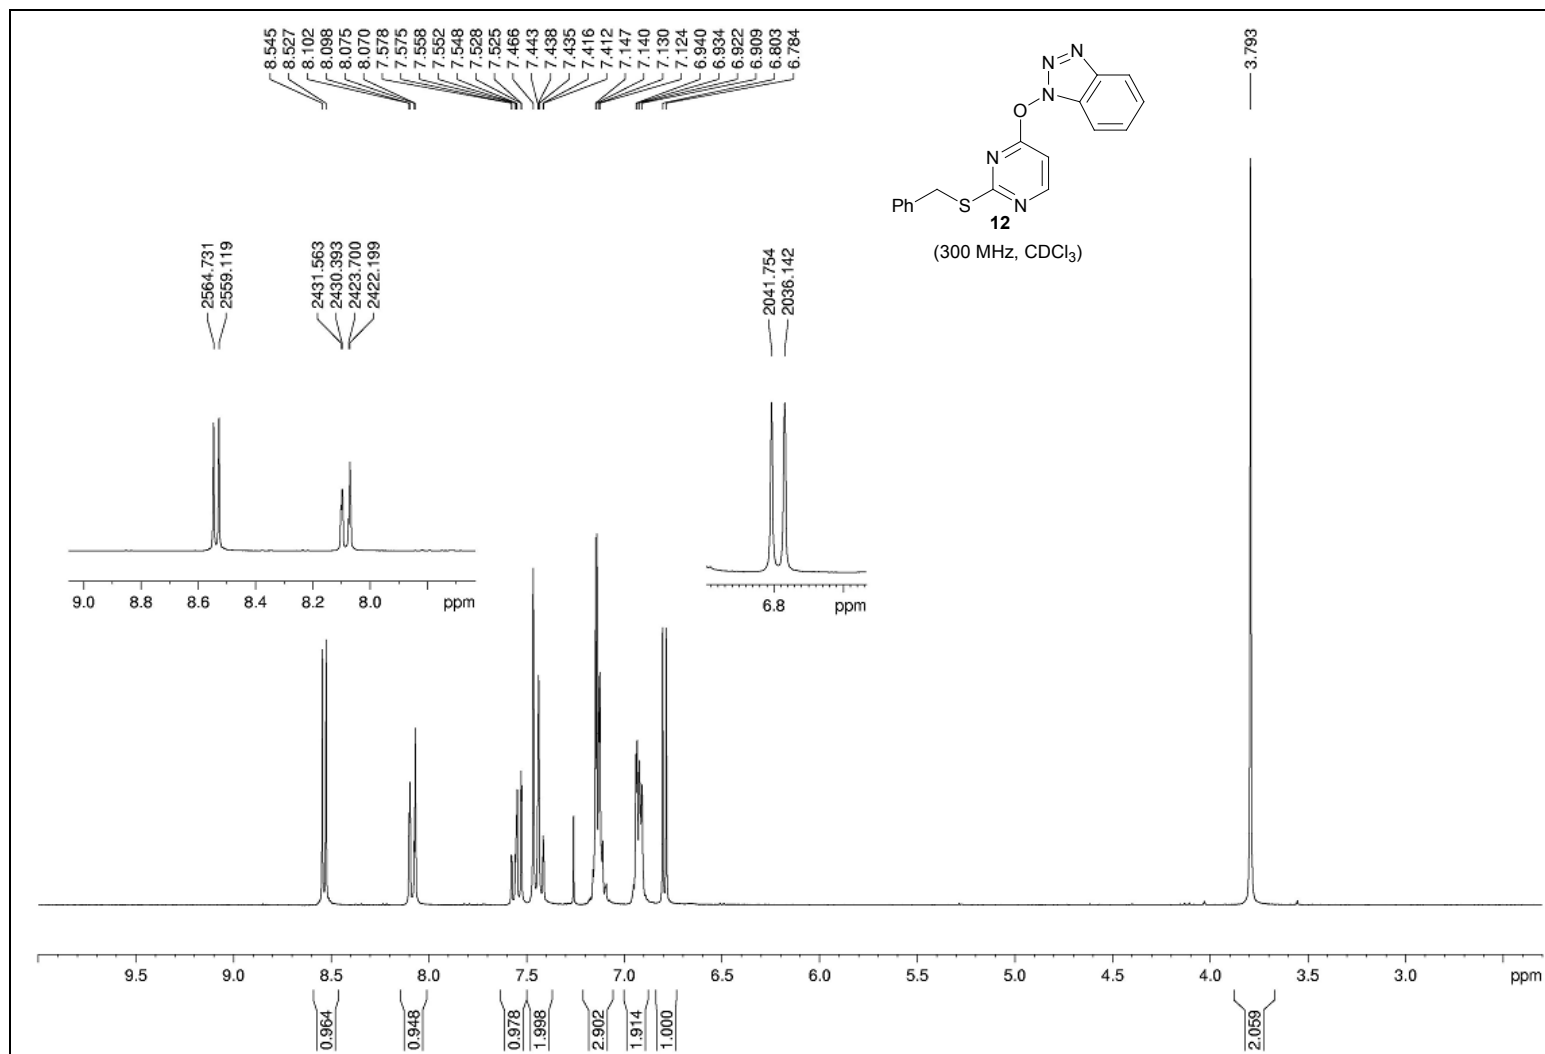

**$^{13}\text{C}$ -NMR and DEPT experiment of compound 12**

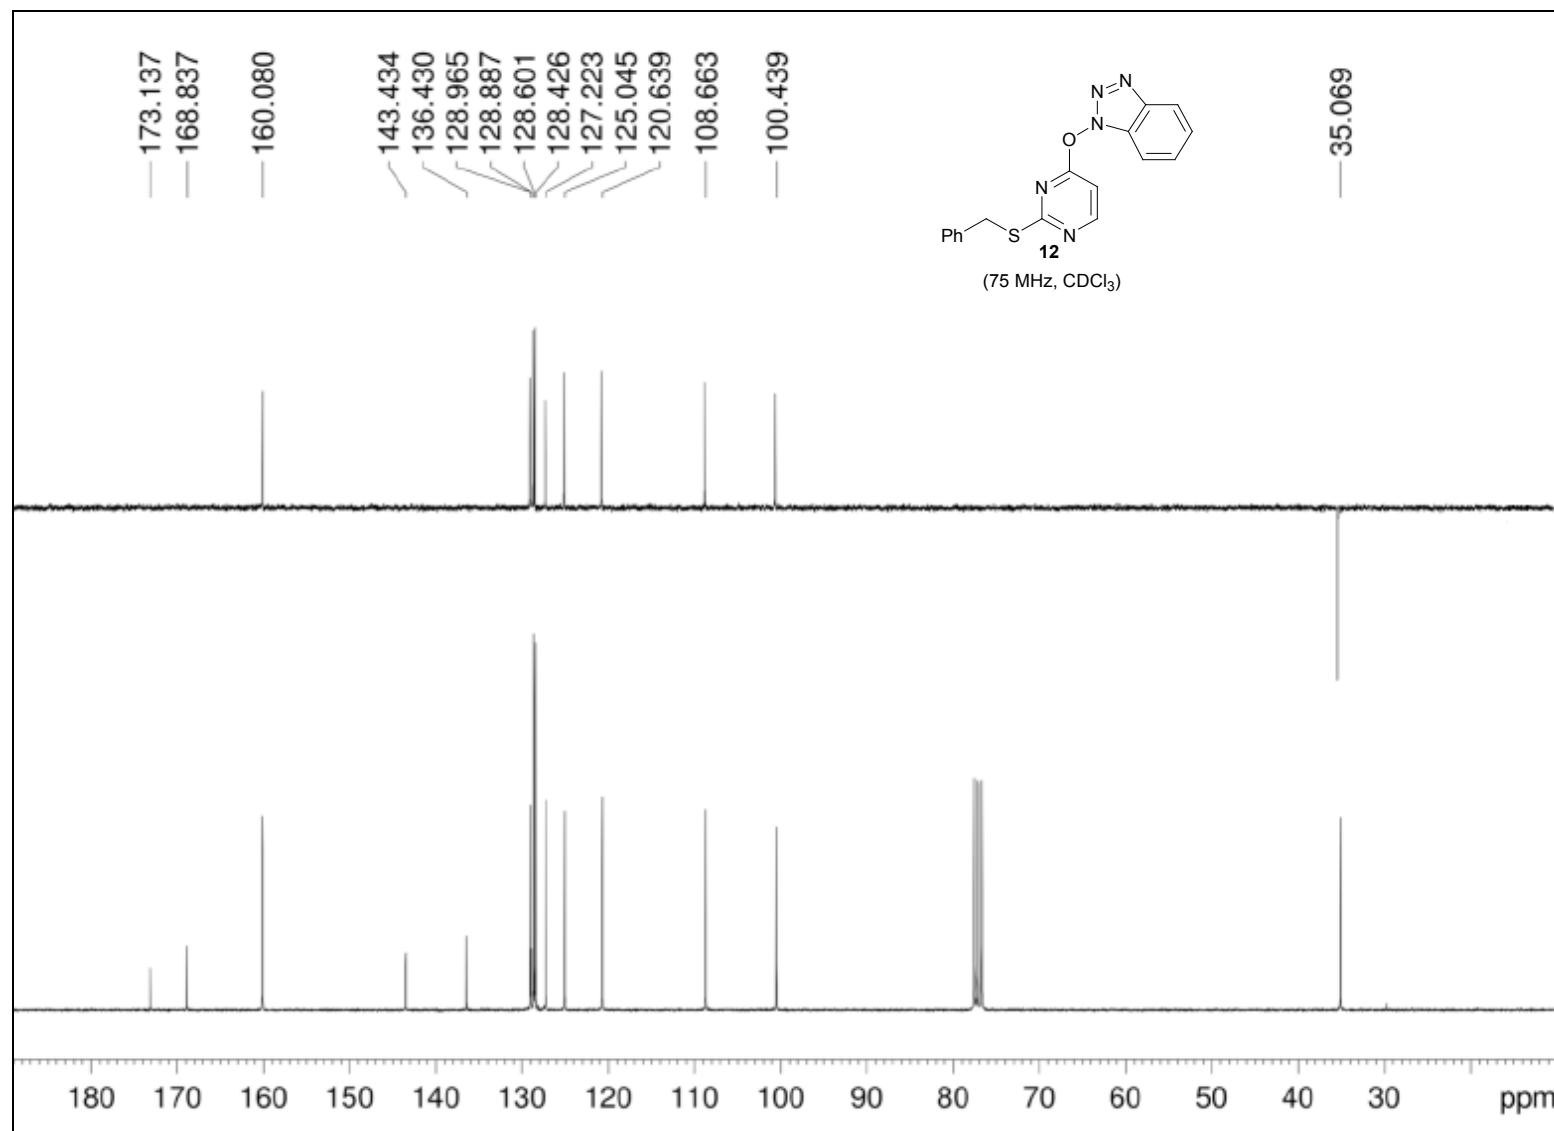

<sup>1</sup>H-NMR of compound 10

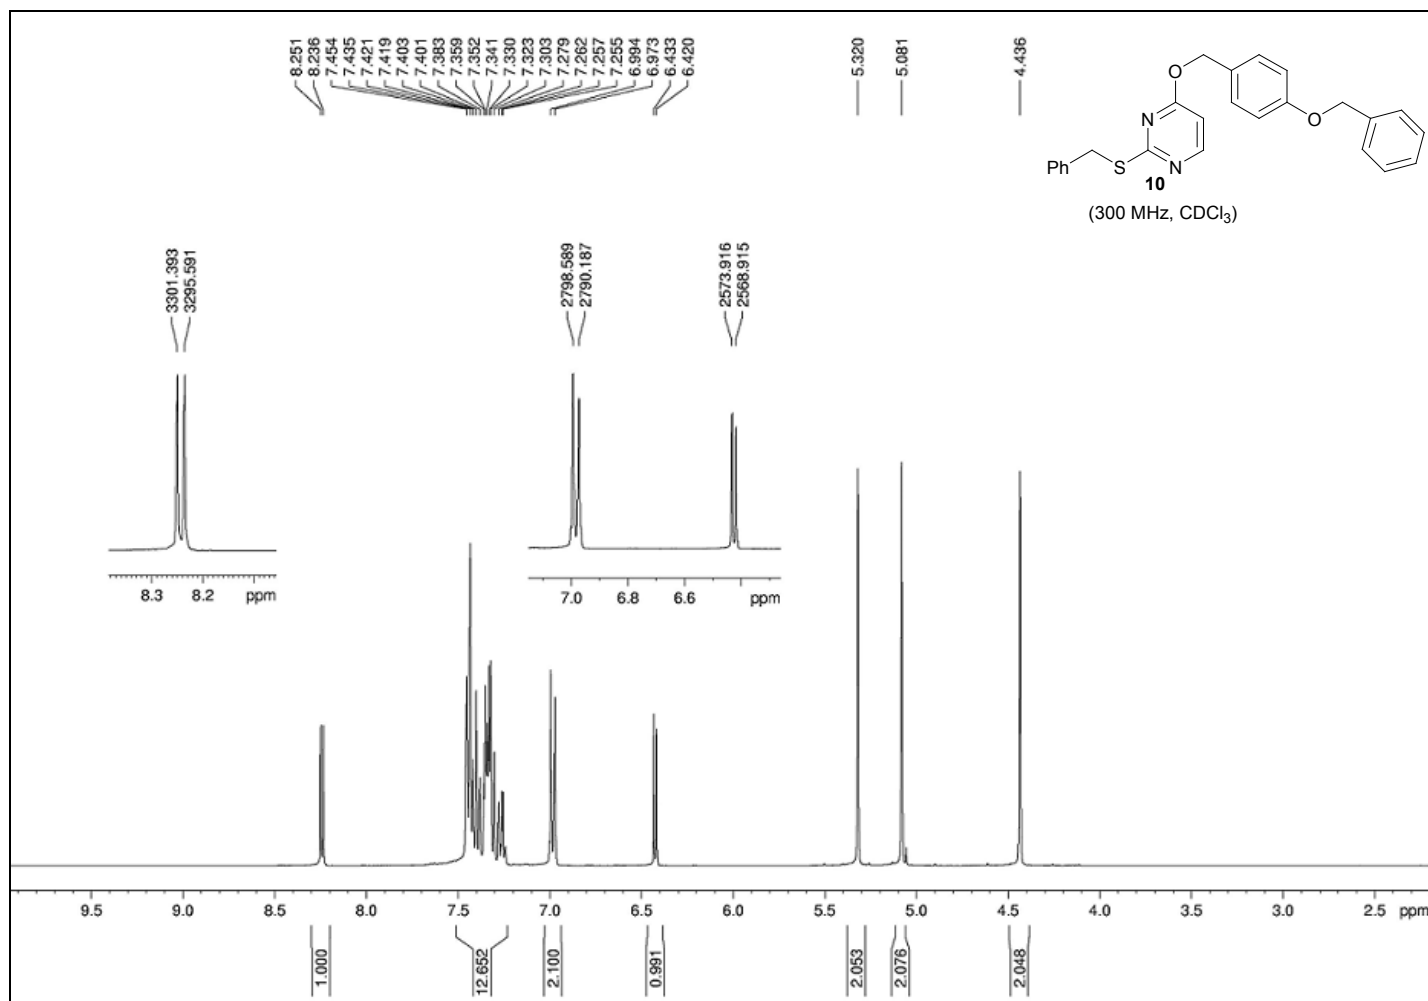

**$^{13}\text{C}$ -NMR and DEPT experiment of compound 10**

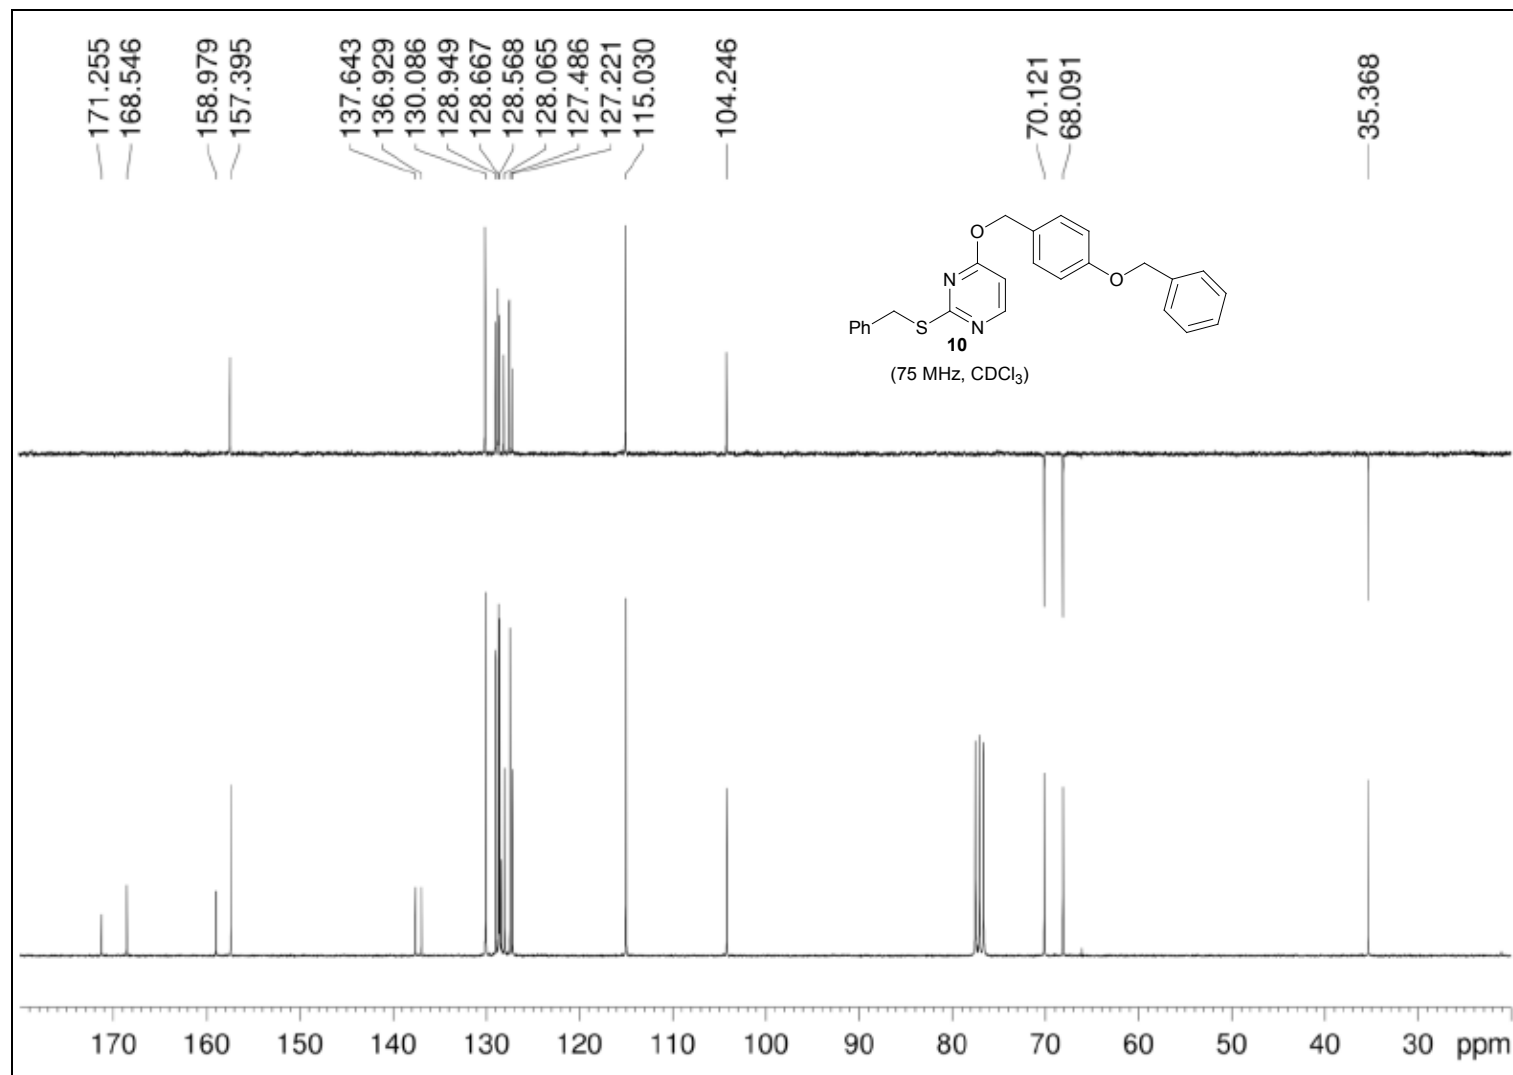

<sup>1</sup>H-NMR of compound 8

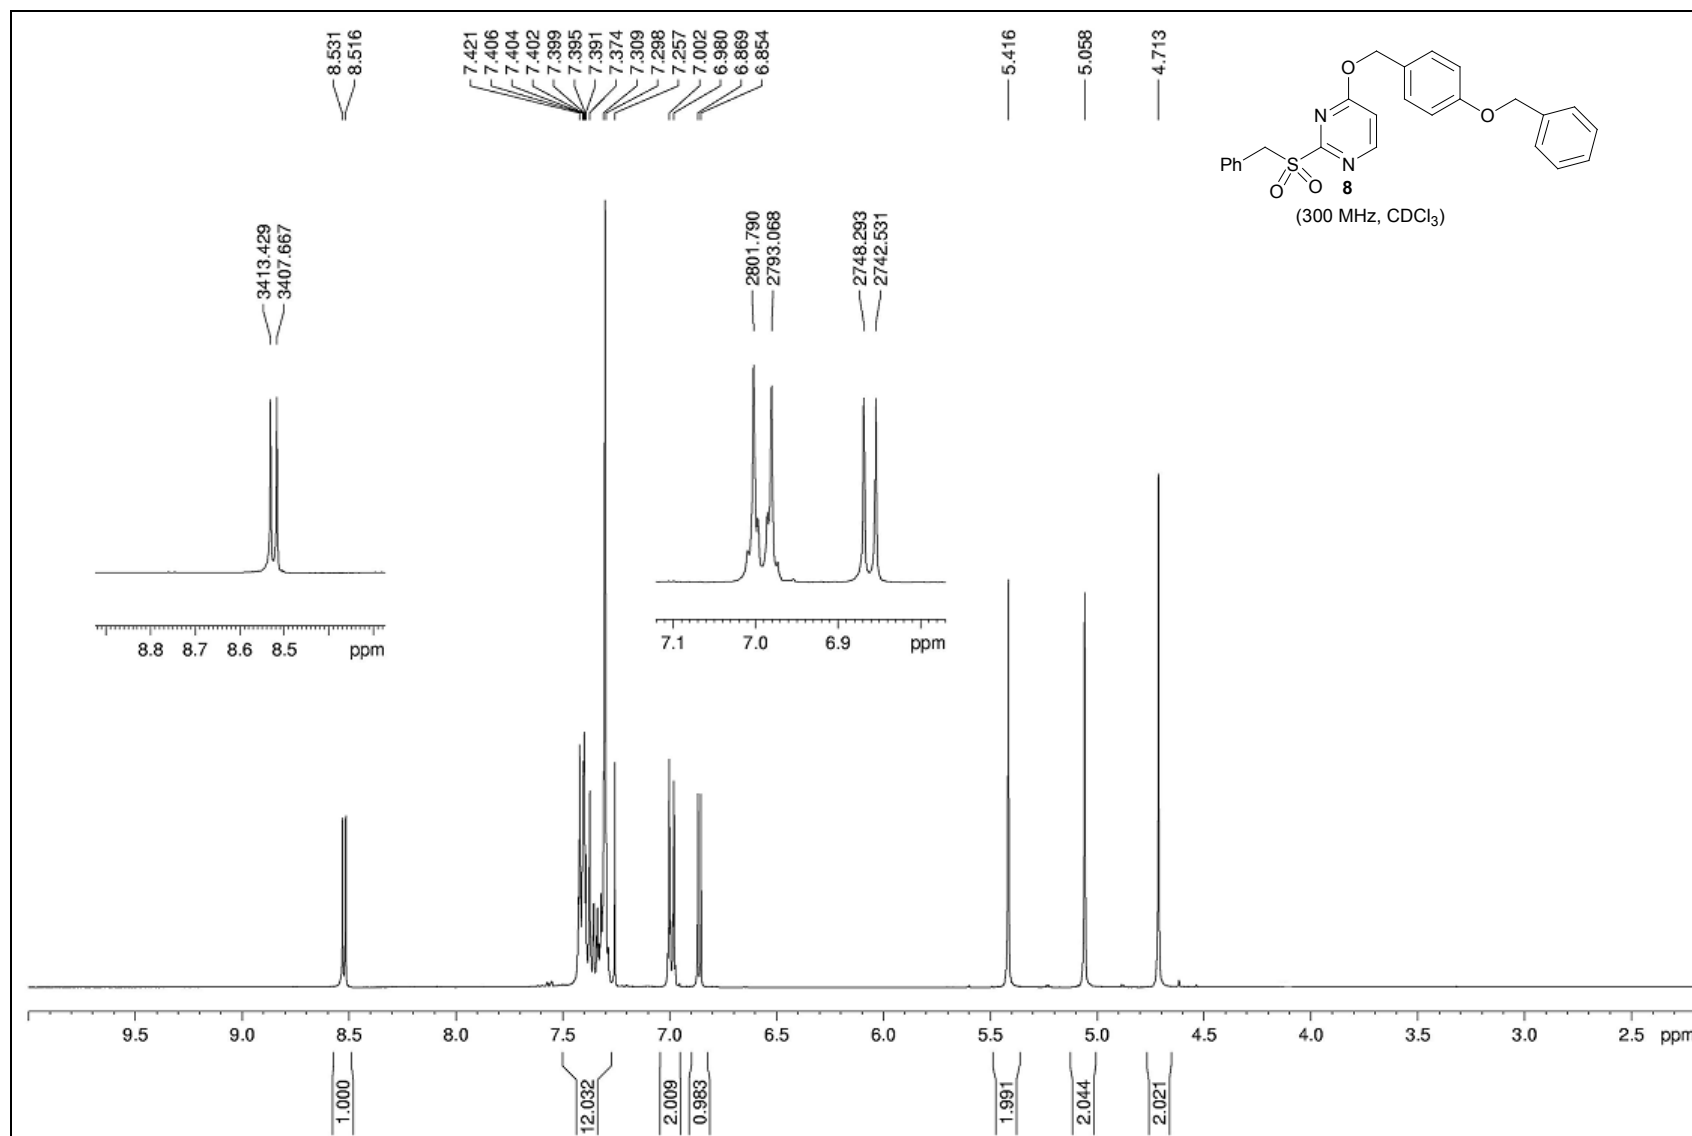

**<sup>13</sup>C-NMR and DEPT experiment of compound 8**

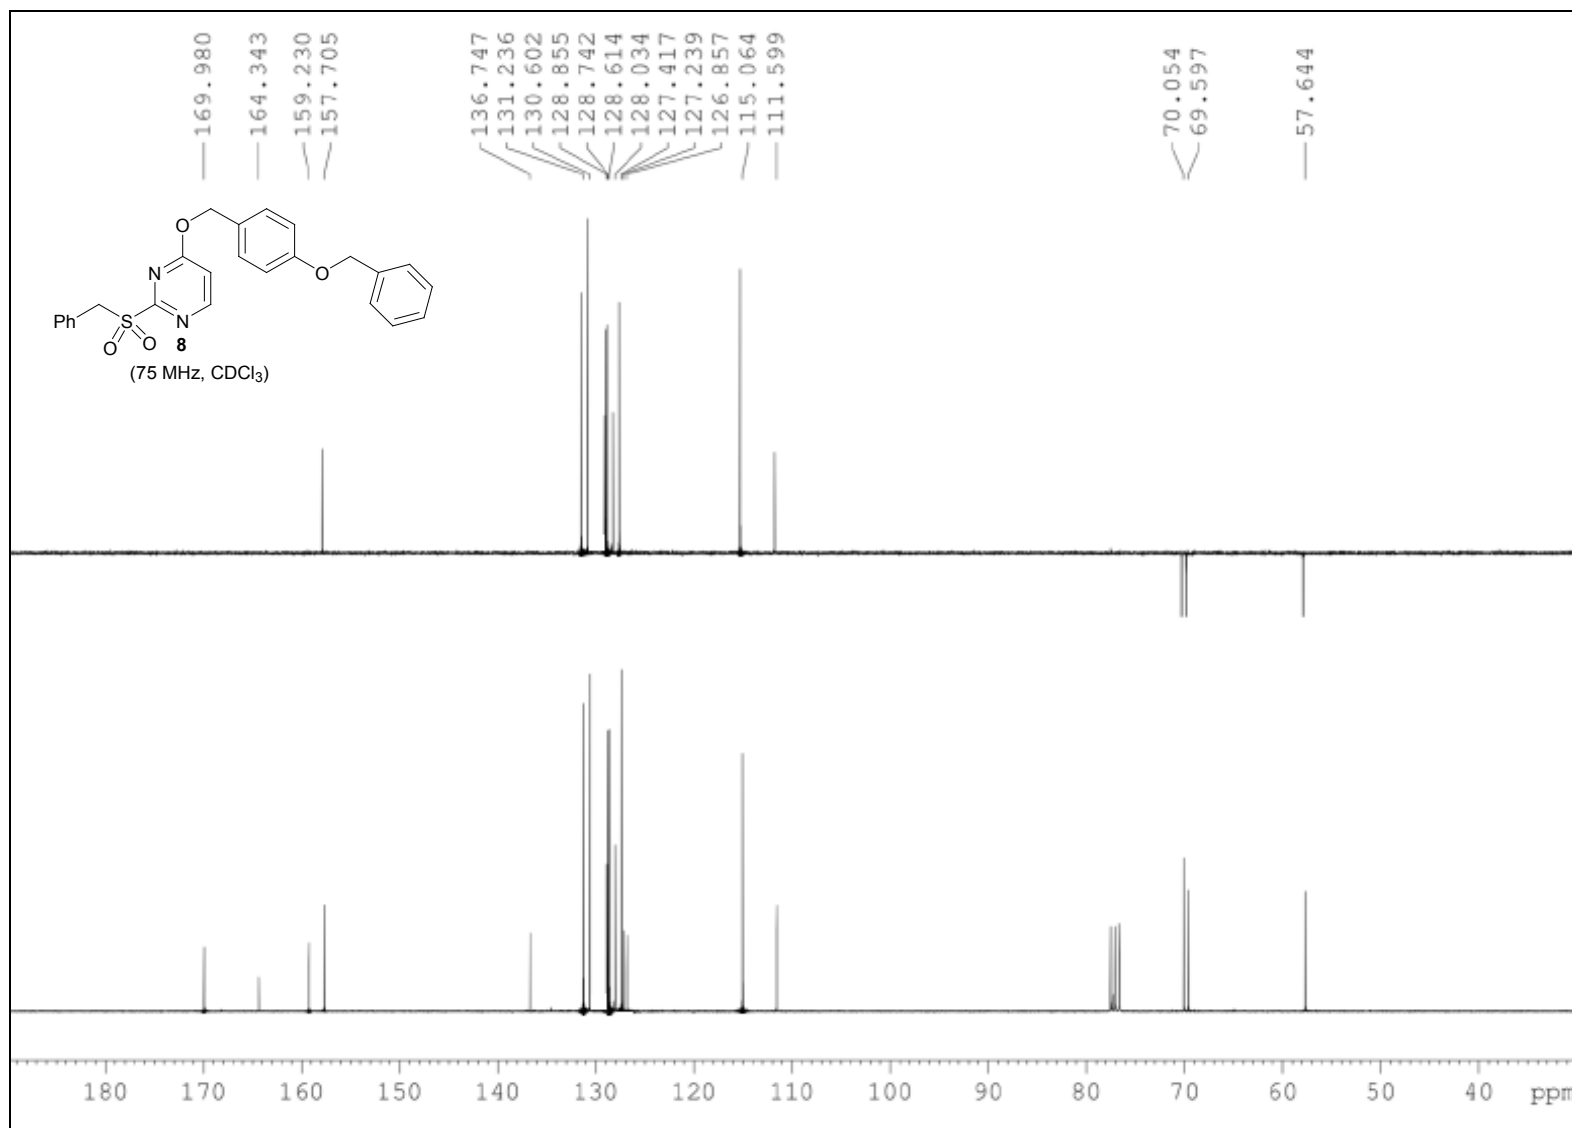

**<sup>1</sup>H-NMR of compound 13**

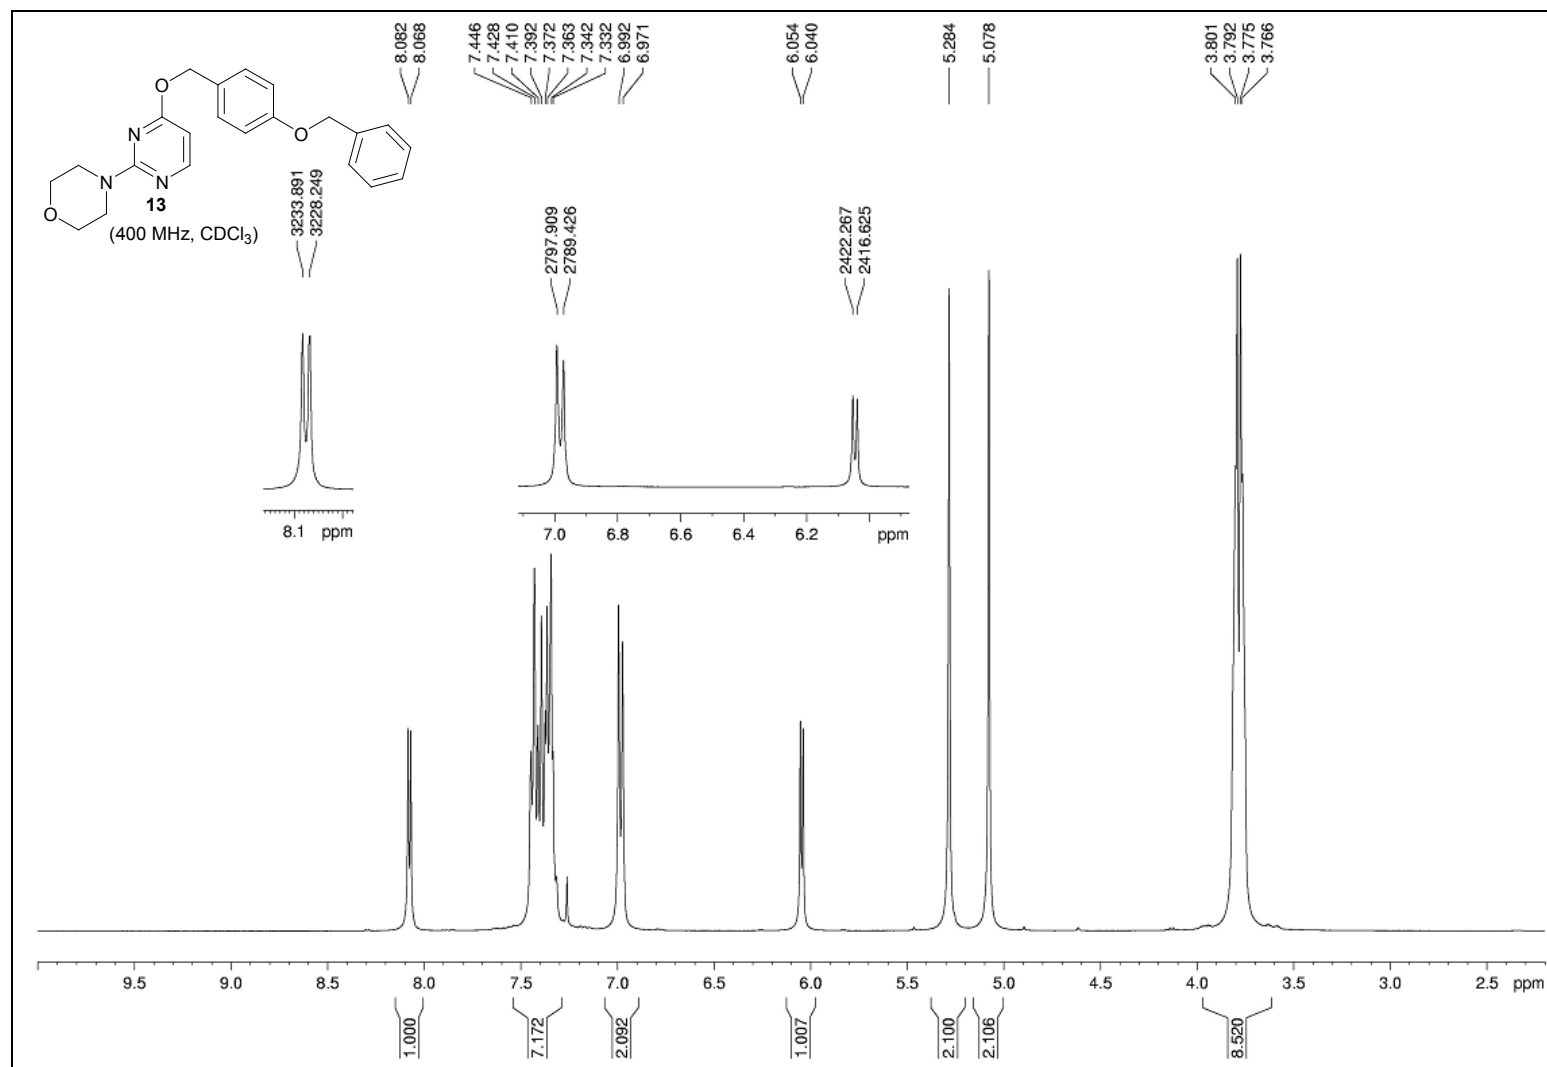



**$^{13}\text{C}$ -NMR and DEPT experiment of compound 13**

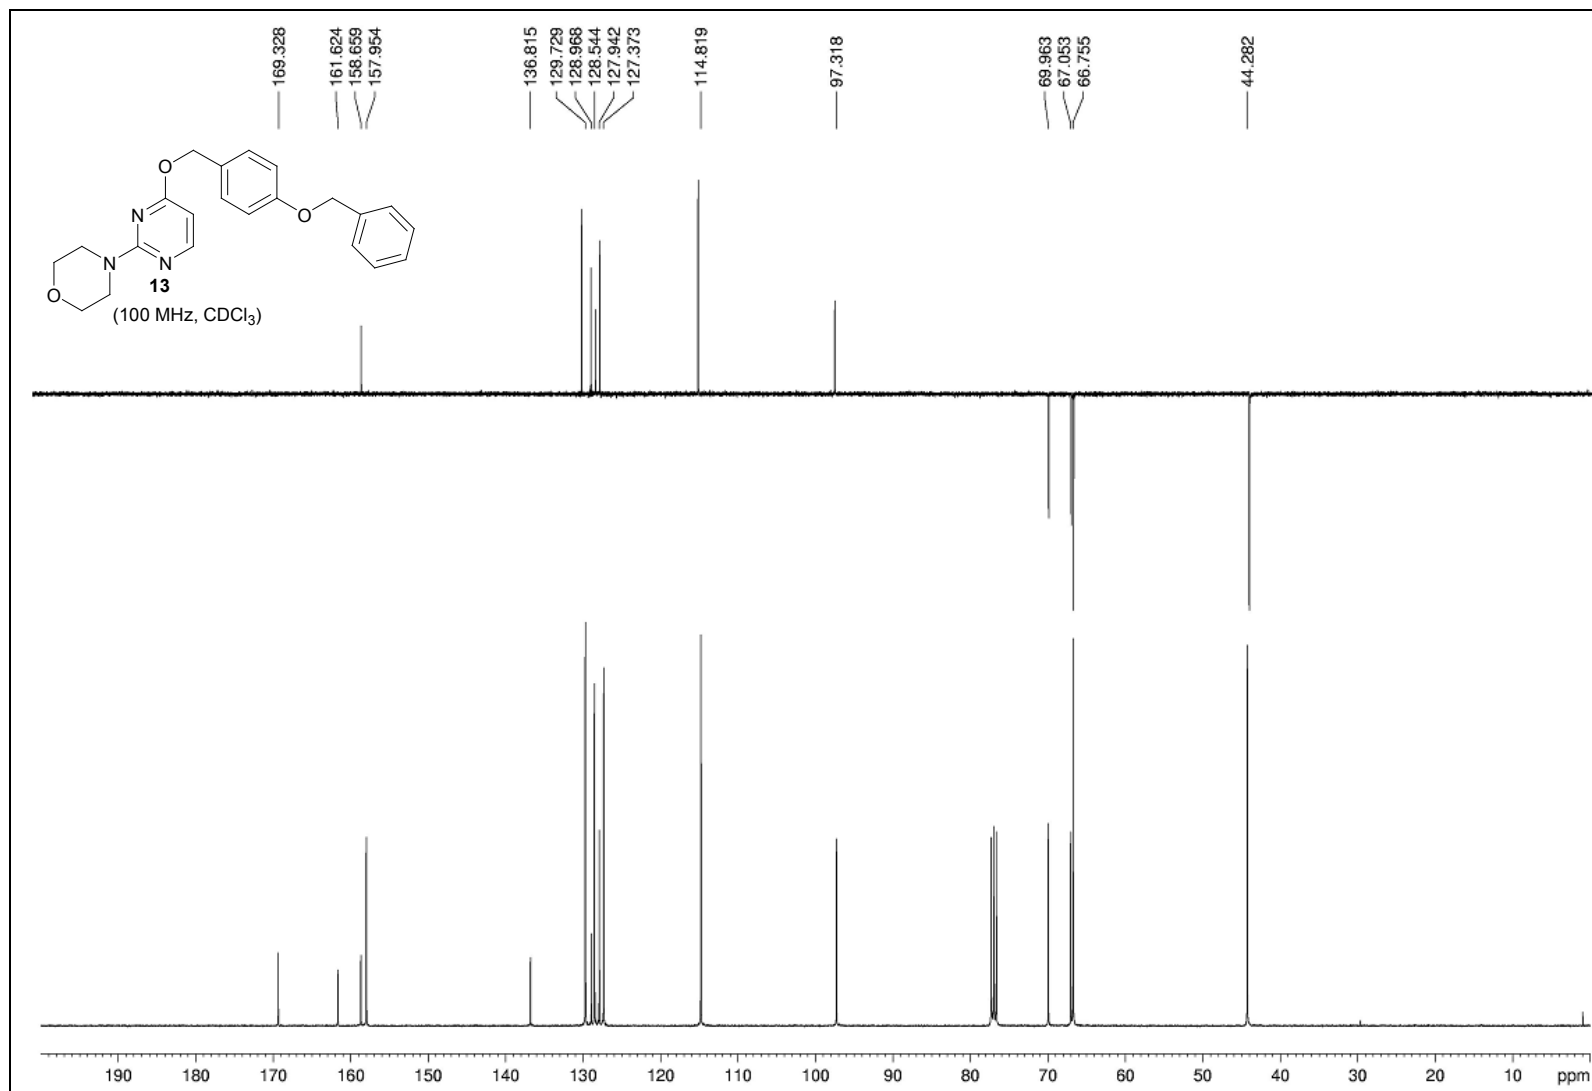

<sup>1</sup>H-NMR of compound 9a

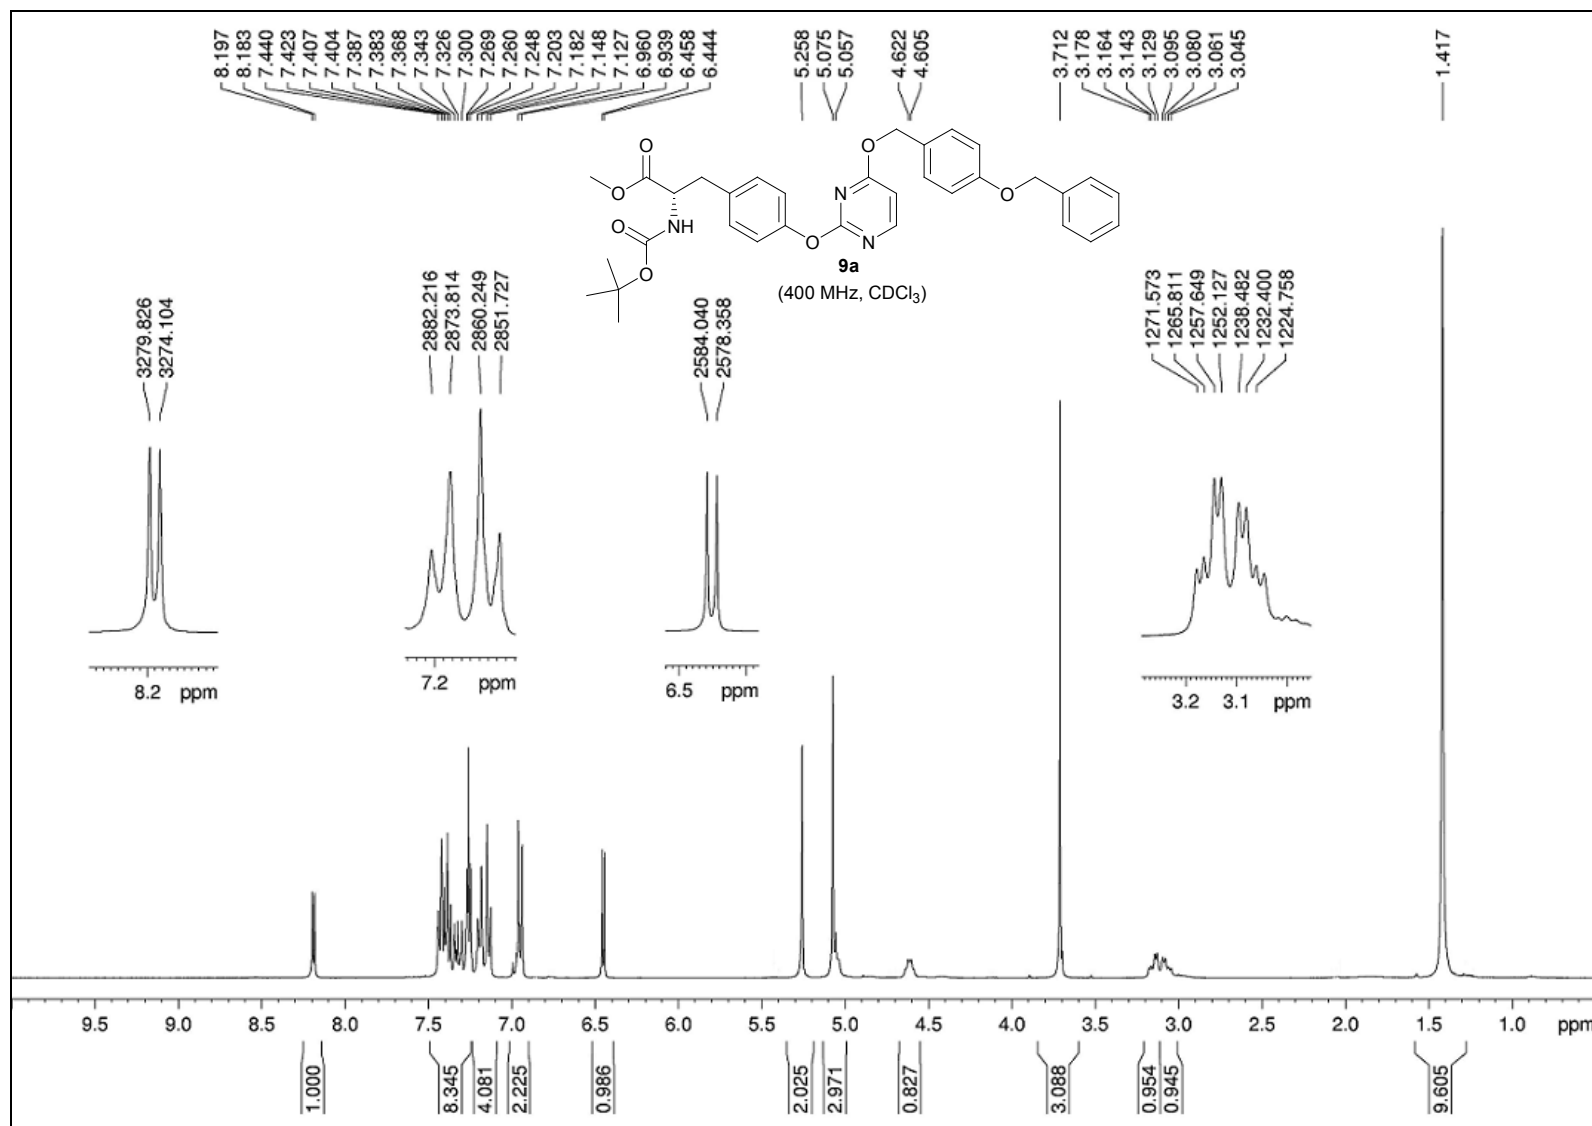

**$^{13}\text{C}$ -NMR and DEPT experiment of compound 9a**

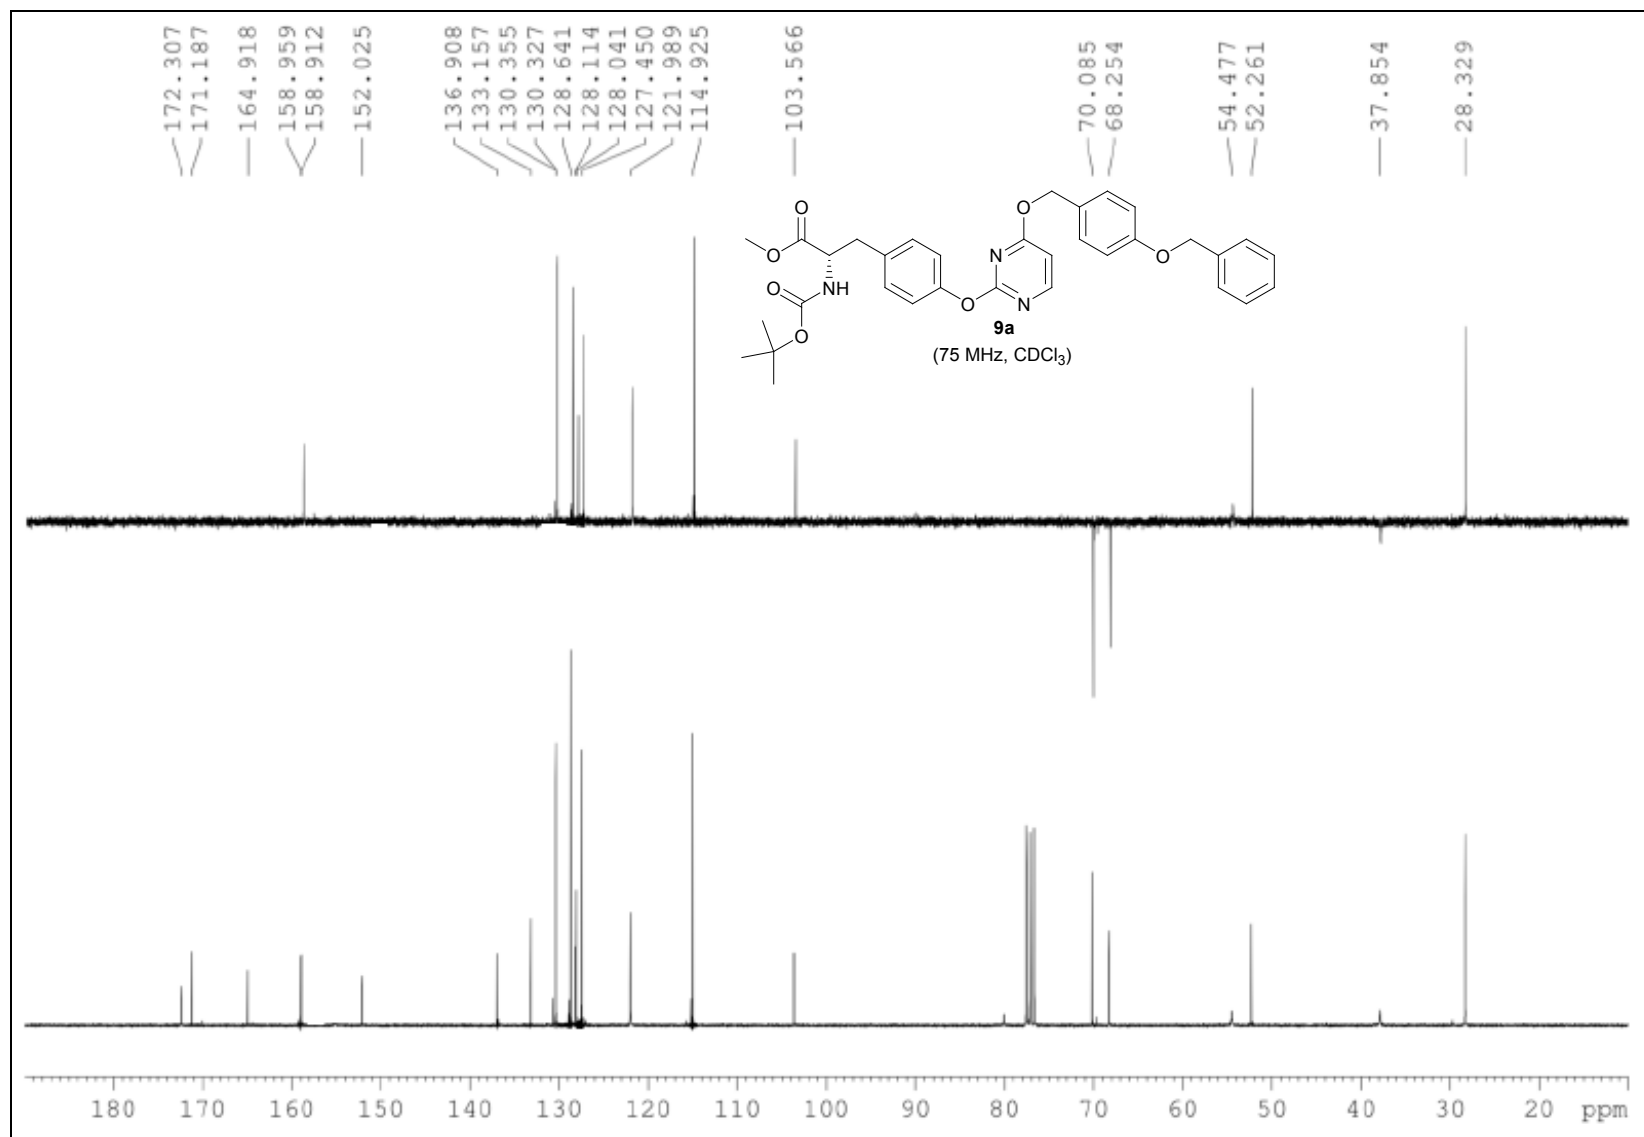

<sup>1</sup>H-NMR of compound 9b

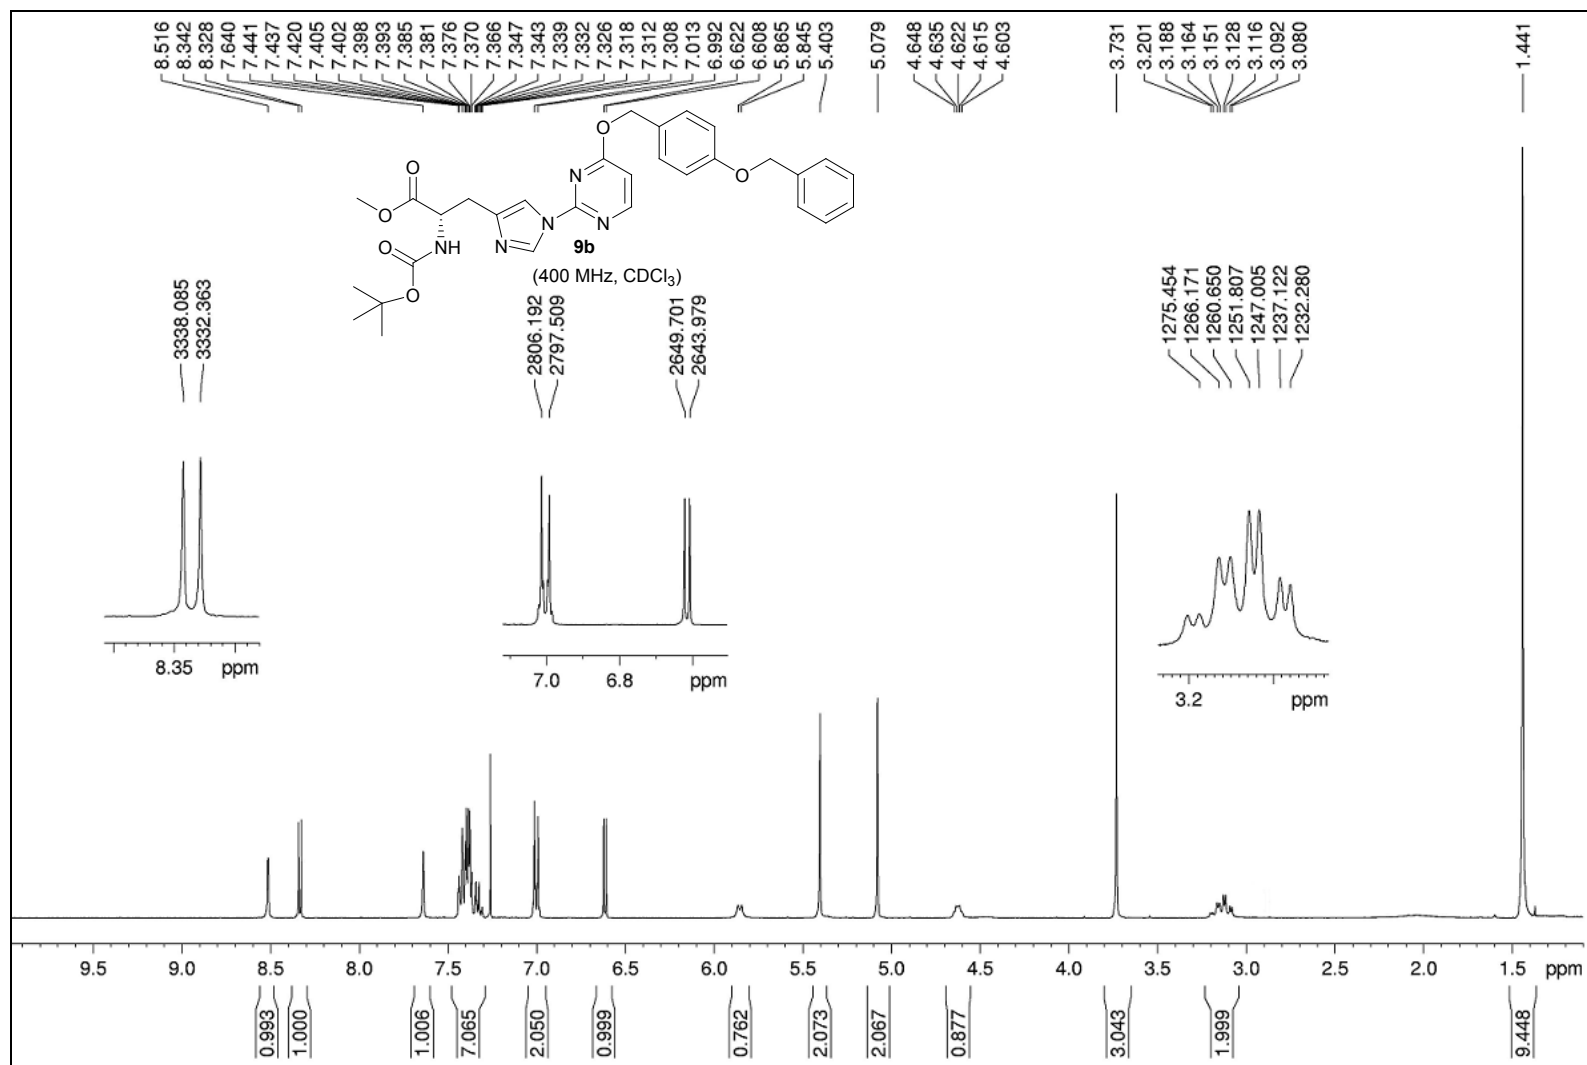

**$^{13}\text{C}$ -NMR and DEPT experiment of compound 9b**

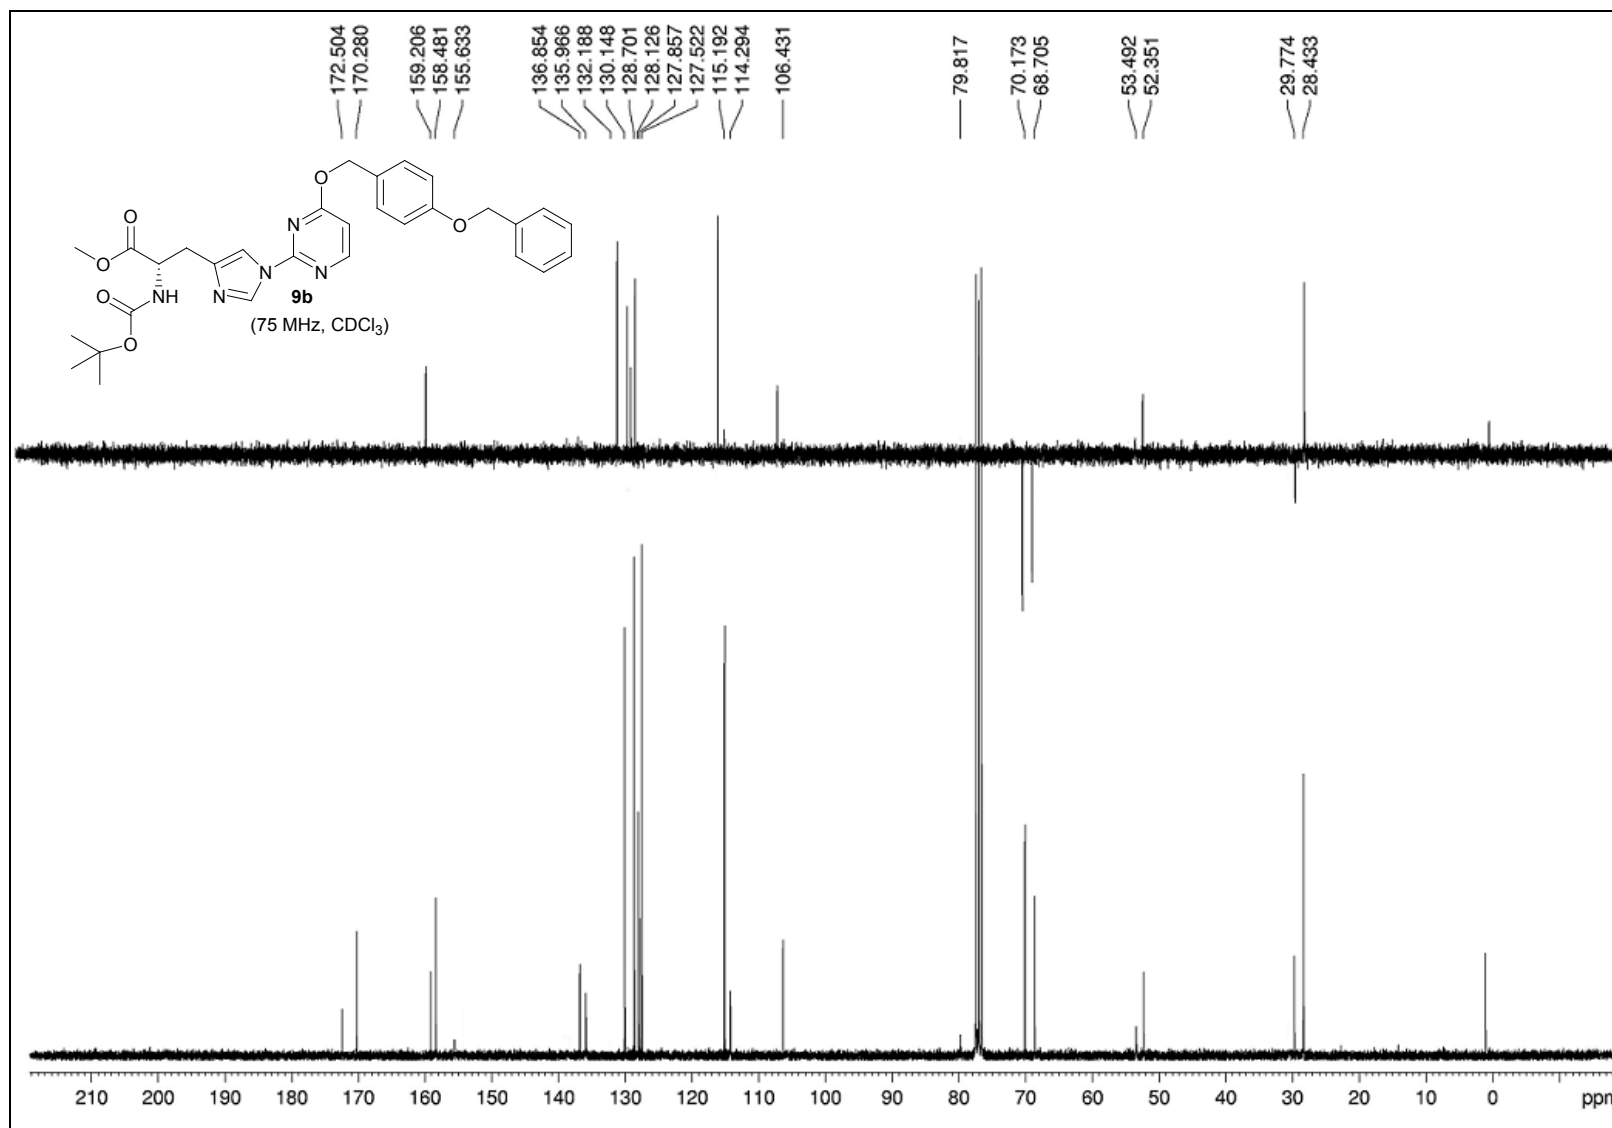

### <sup>1</sup>H-NMR of compound 9c

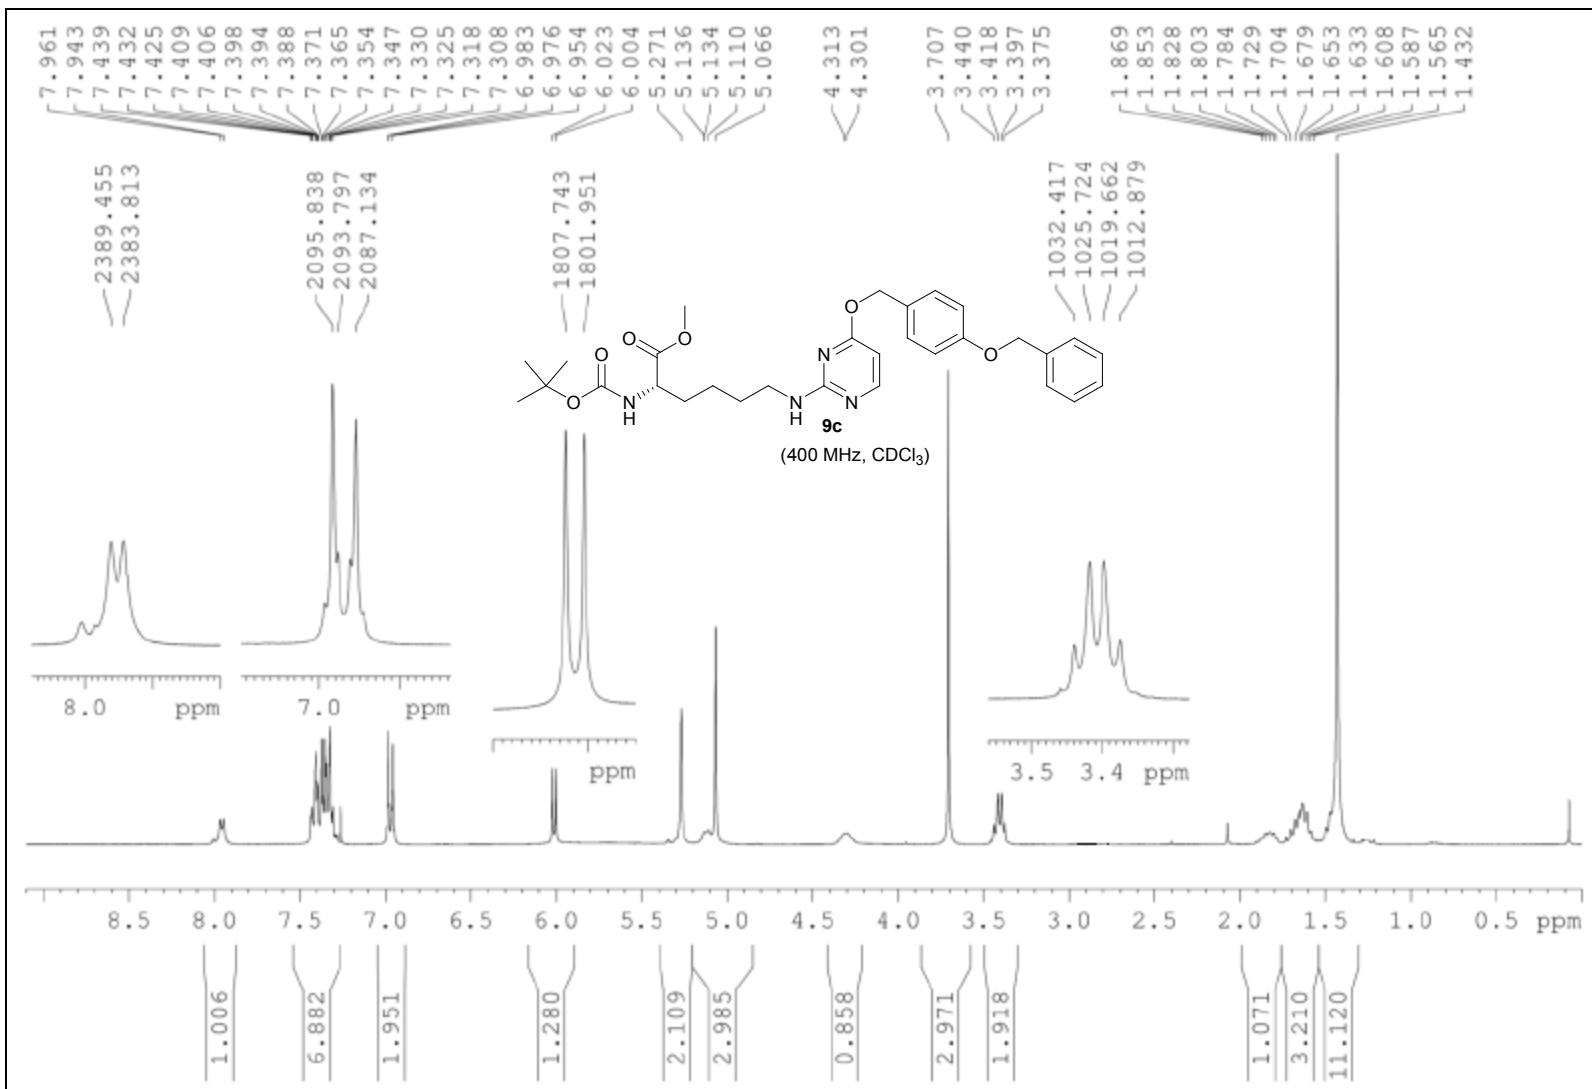

Variable temperature experiment  $^1\text{H}$ -NMR of compound 9c

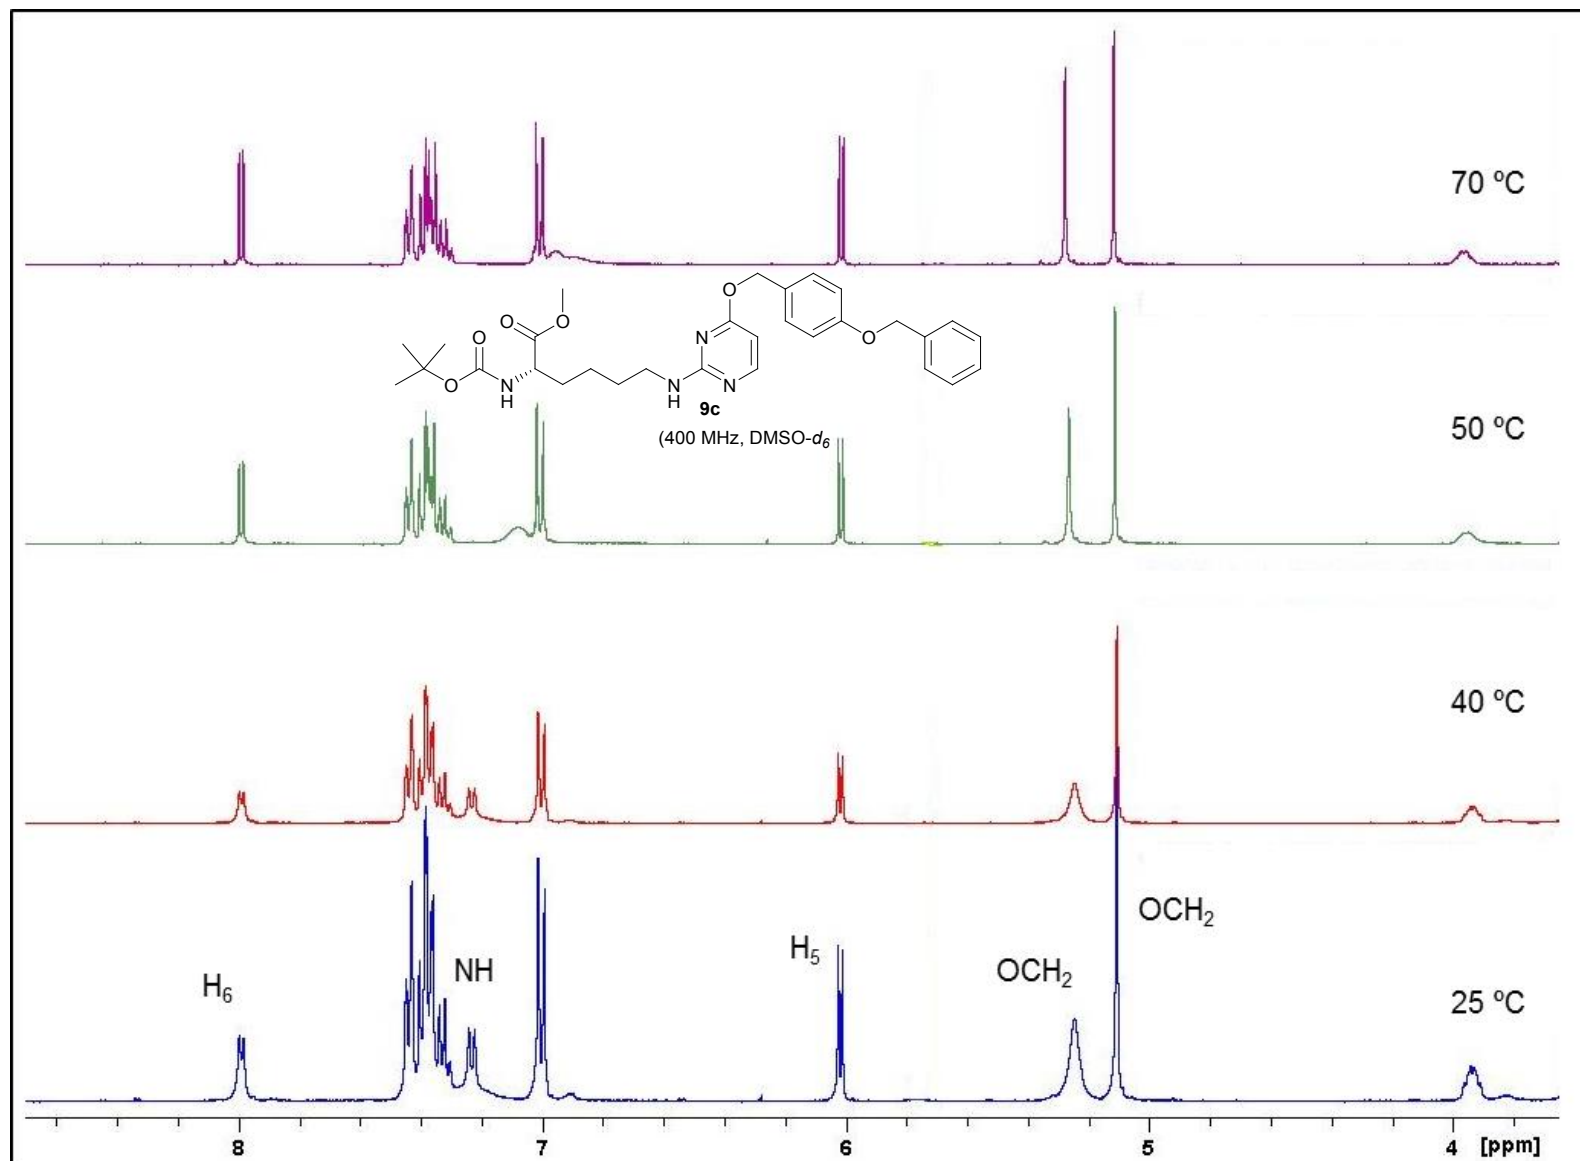

**$^{13}\text{C}$ -NMR and DEPT experiment of compound 9c**

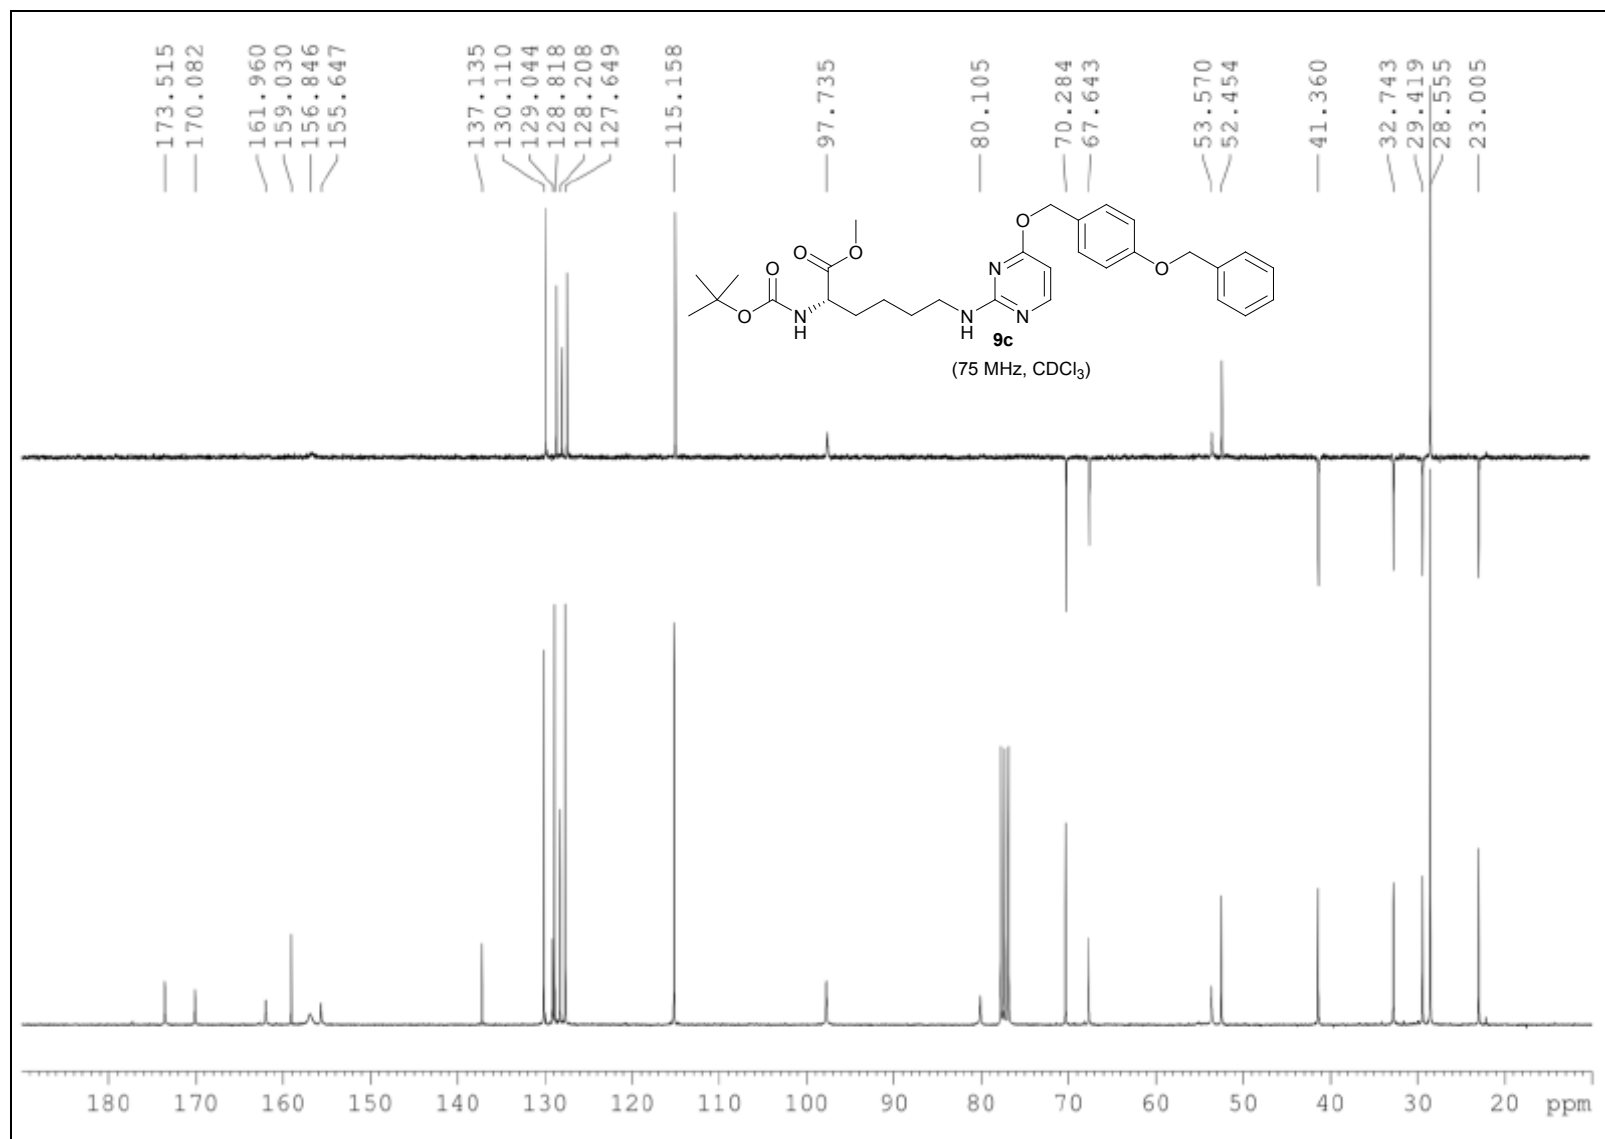



<sup>1</sup>H-NMR of compound 3a

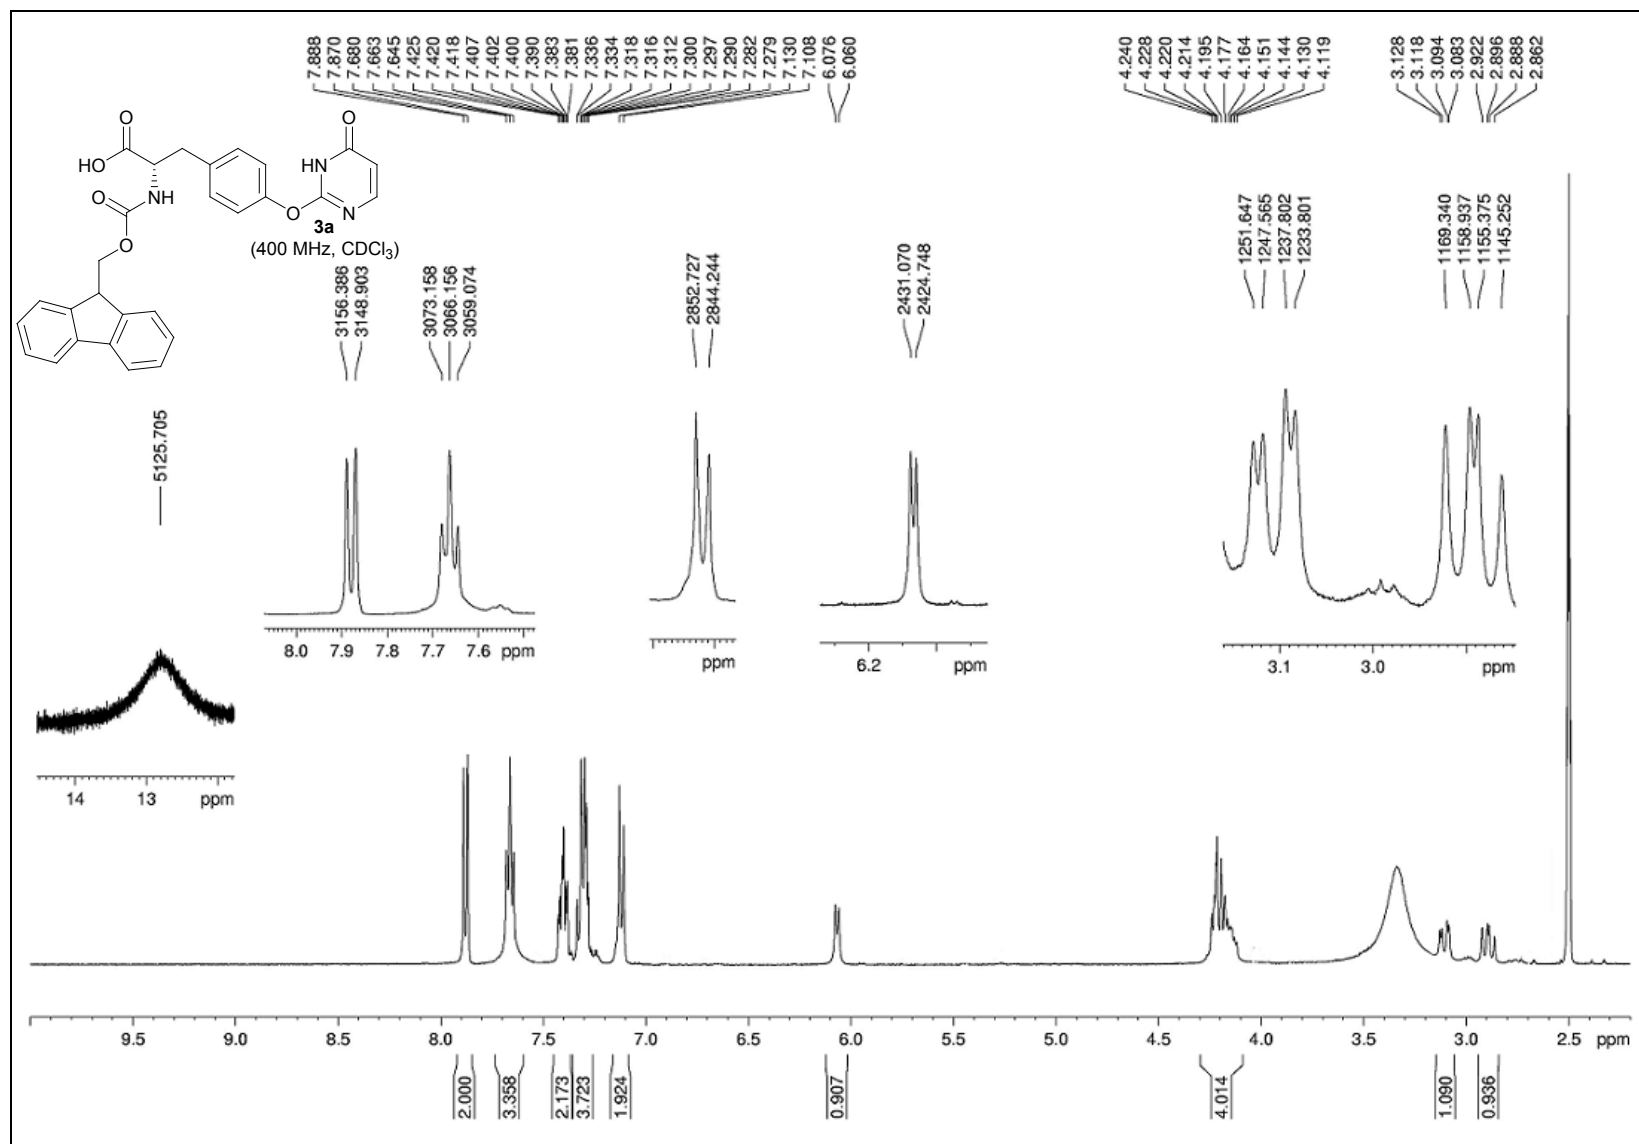

**$^{13}\text{C}$ -NMR and DEPT experiment of compound 3a**

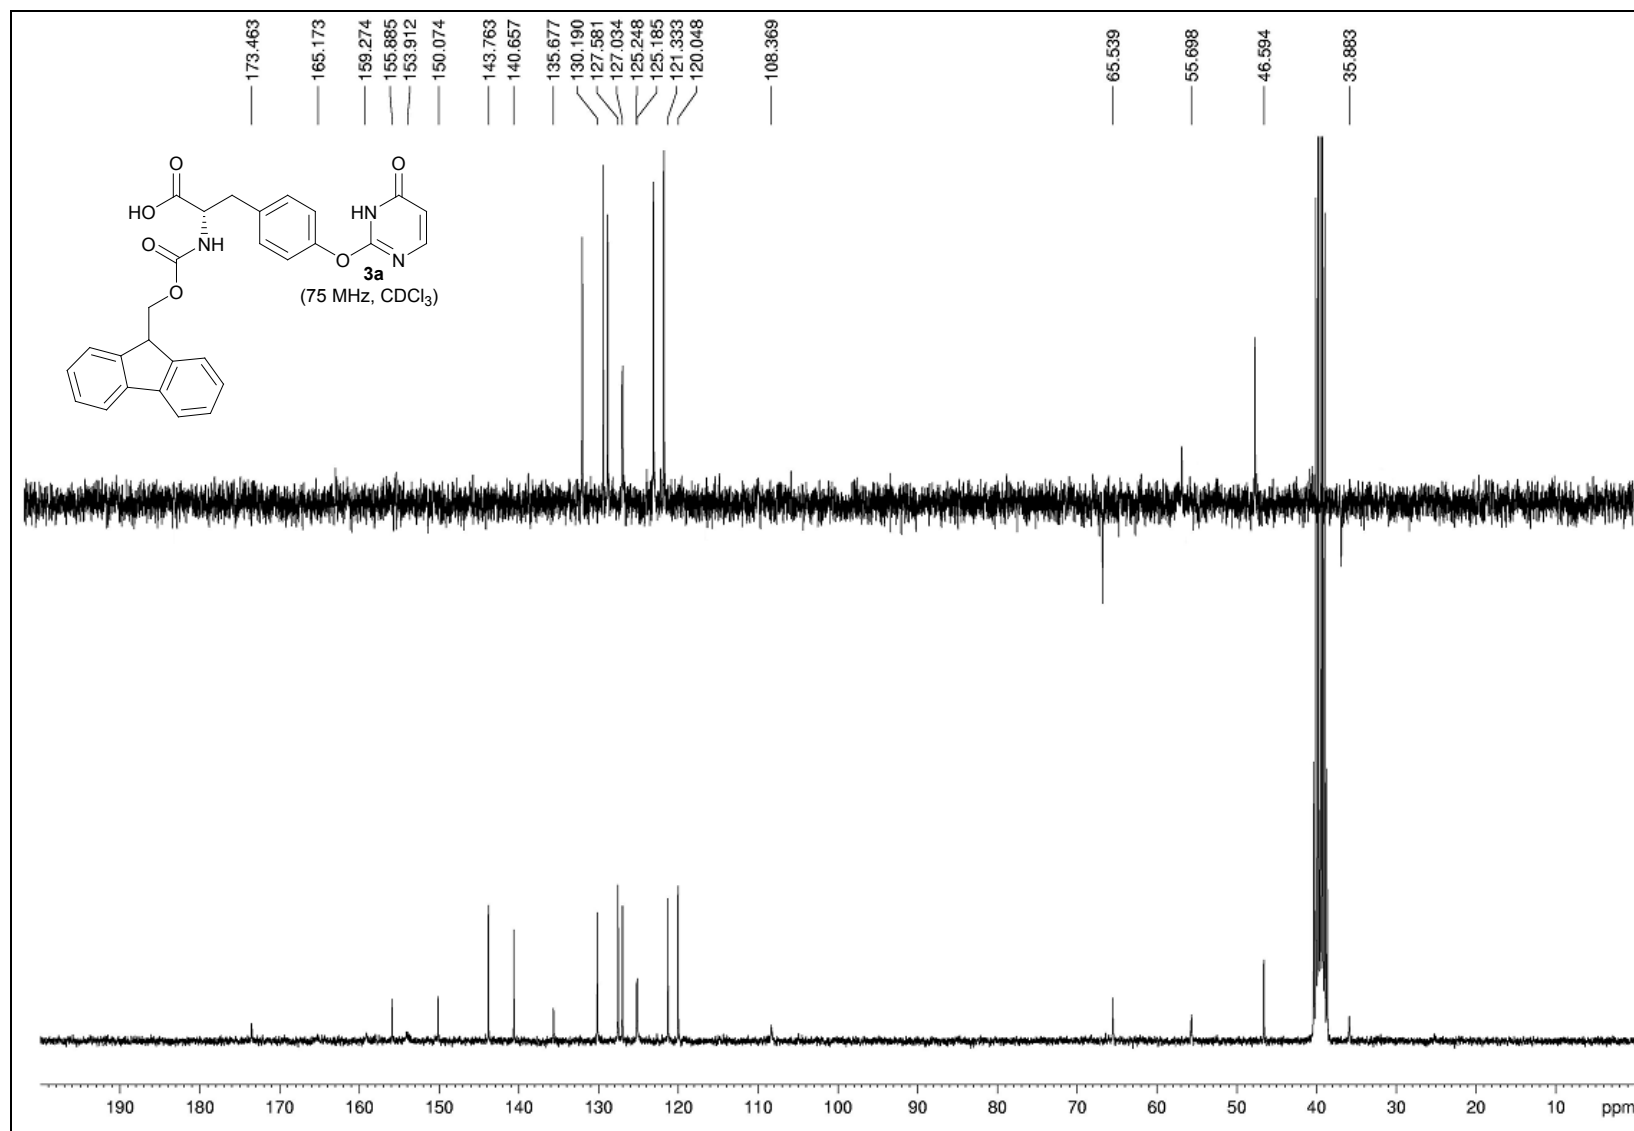

<sup>1</sup>H-NMR of compound 3b

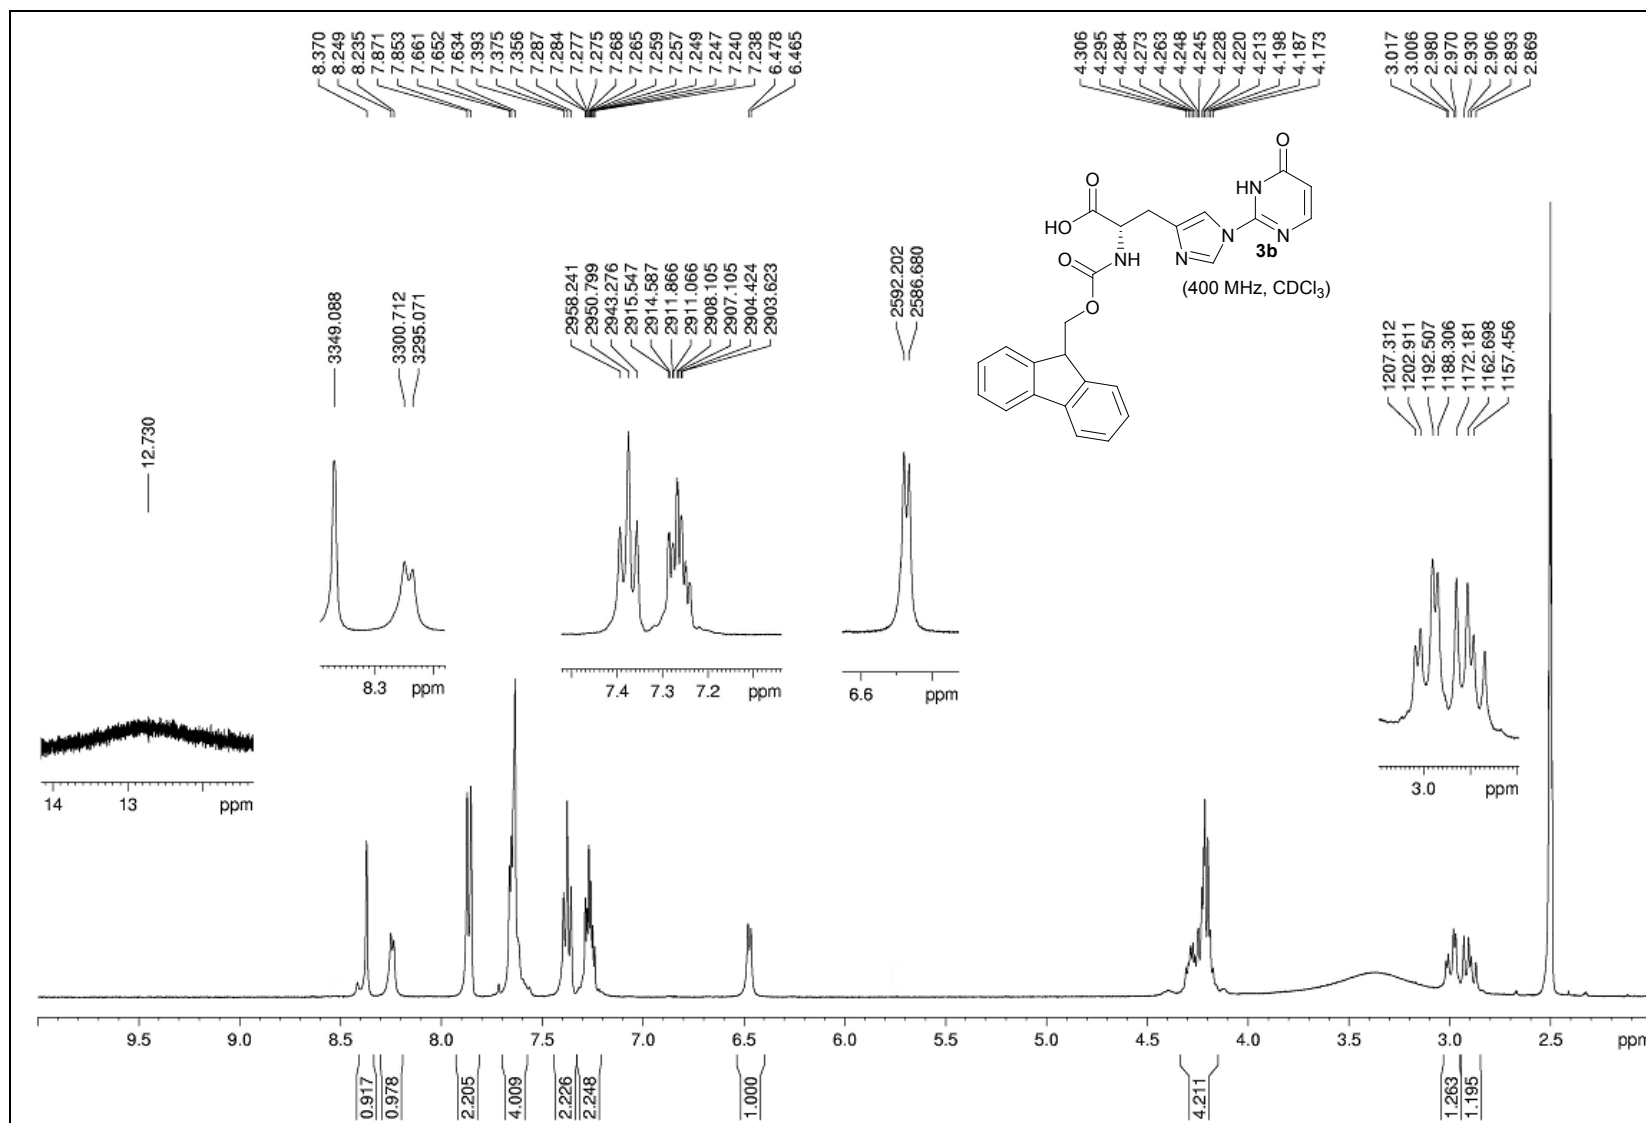

**<sup>13</sup>C-NMR and DEPT experiment of compound 3b**

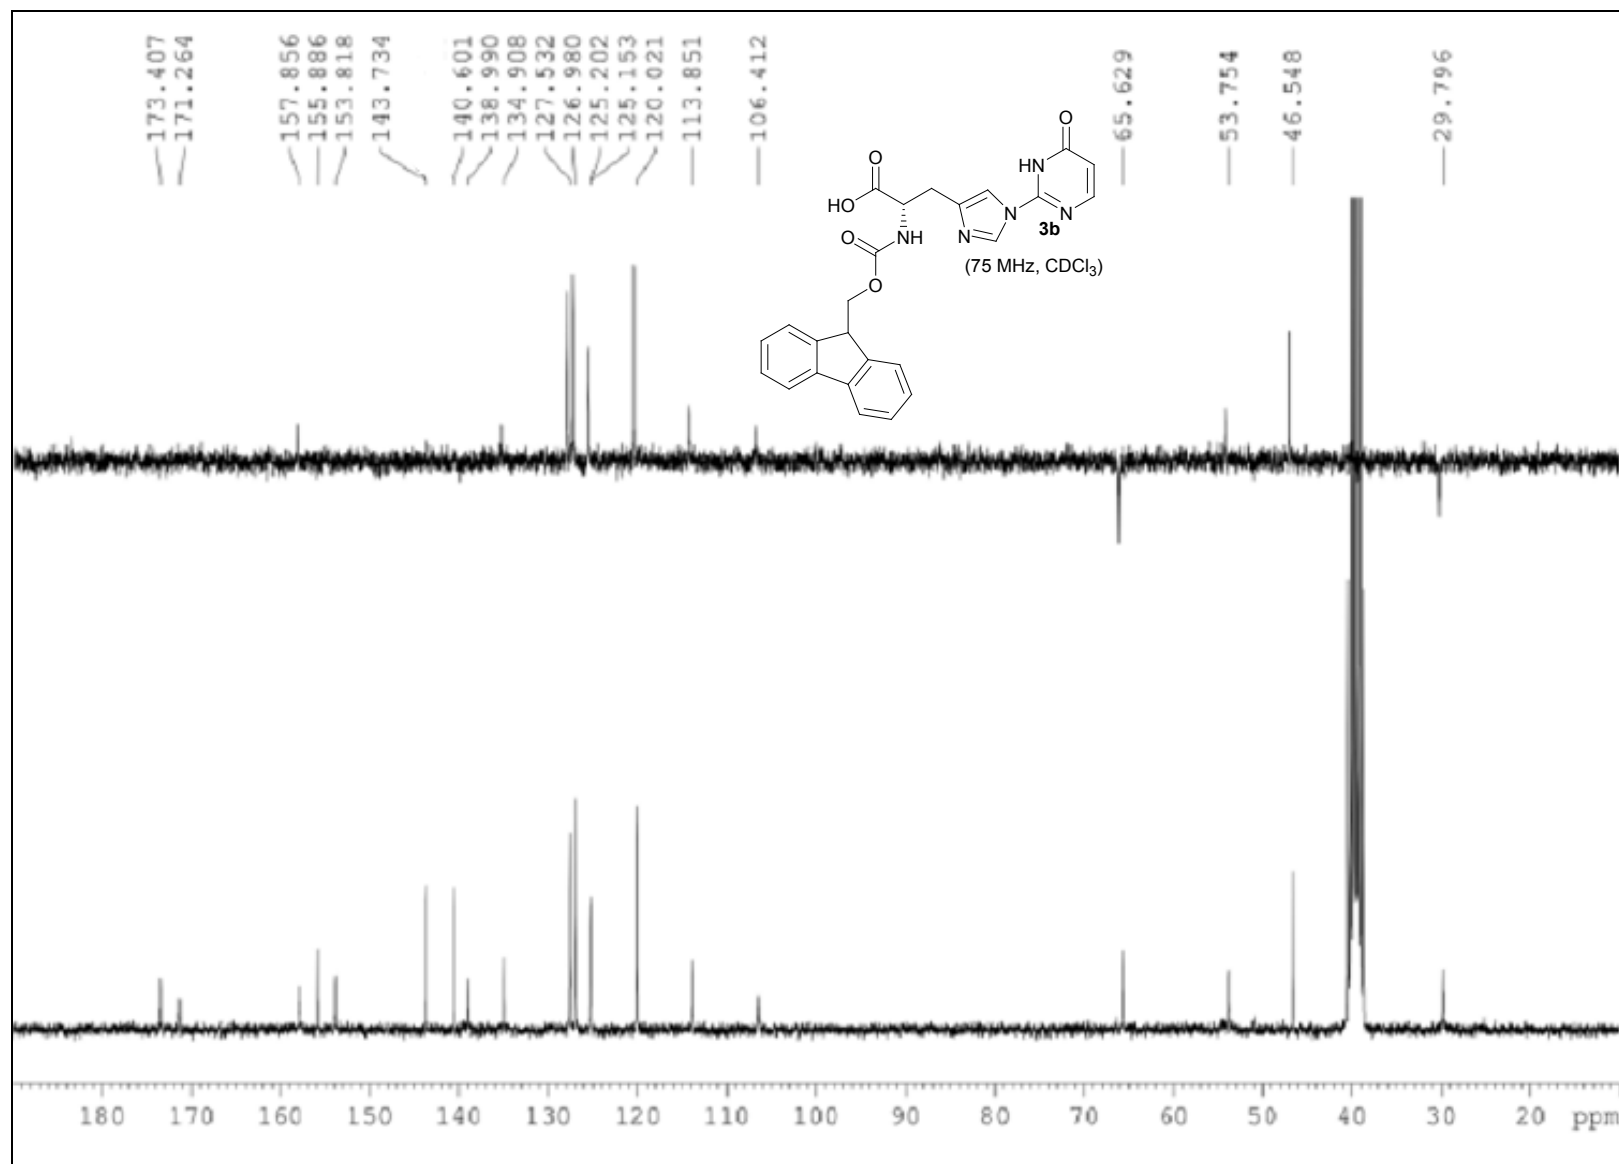

**<sup>1</sup>H-NMR of compound 3c**

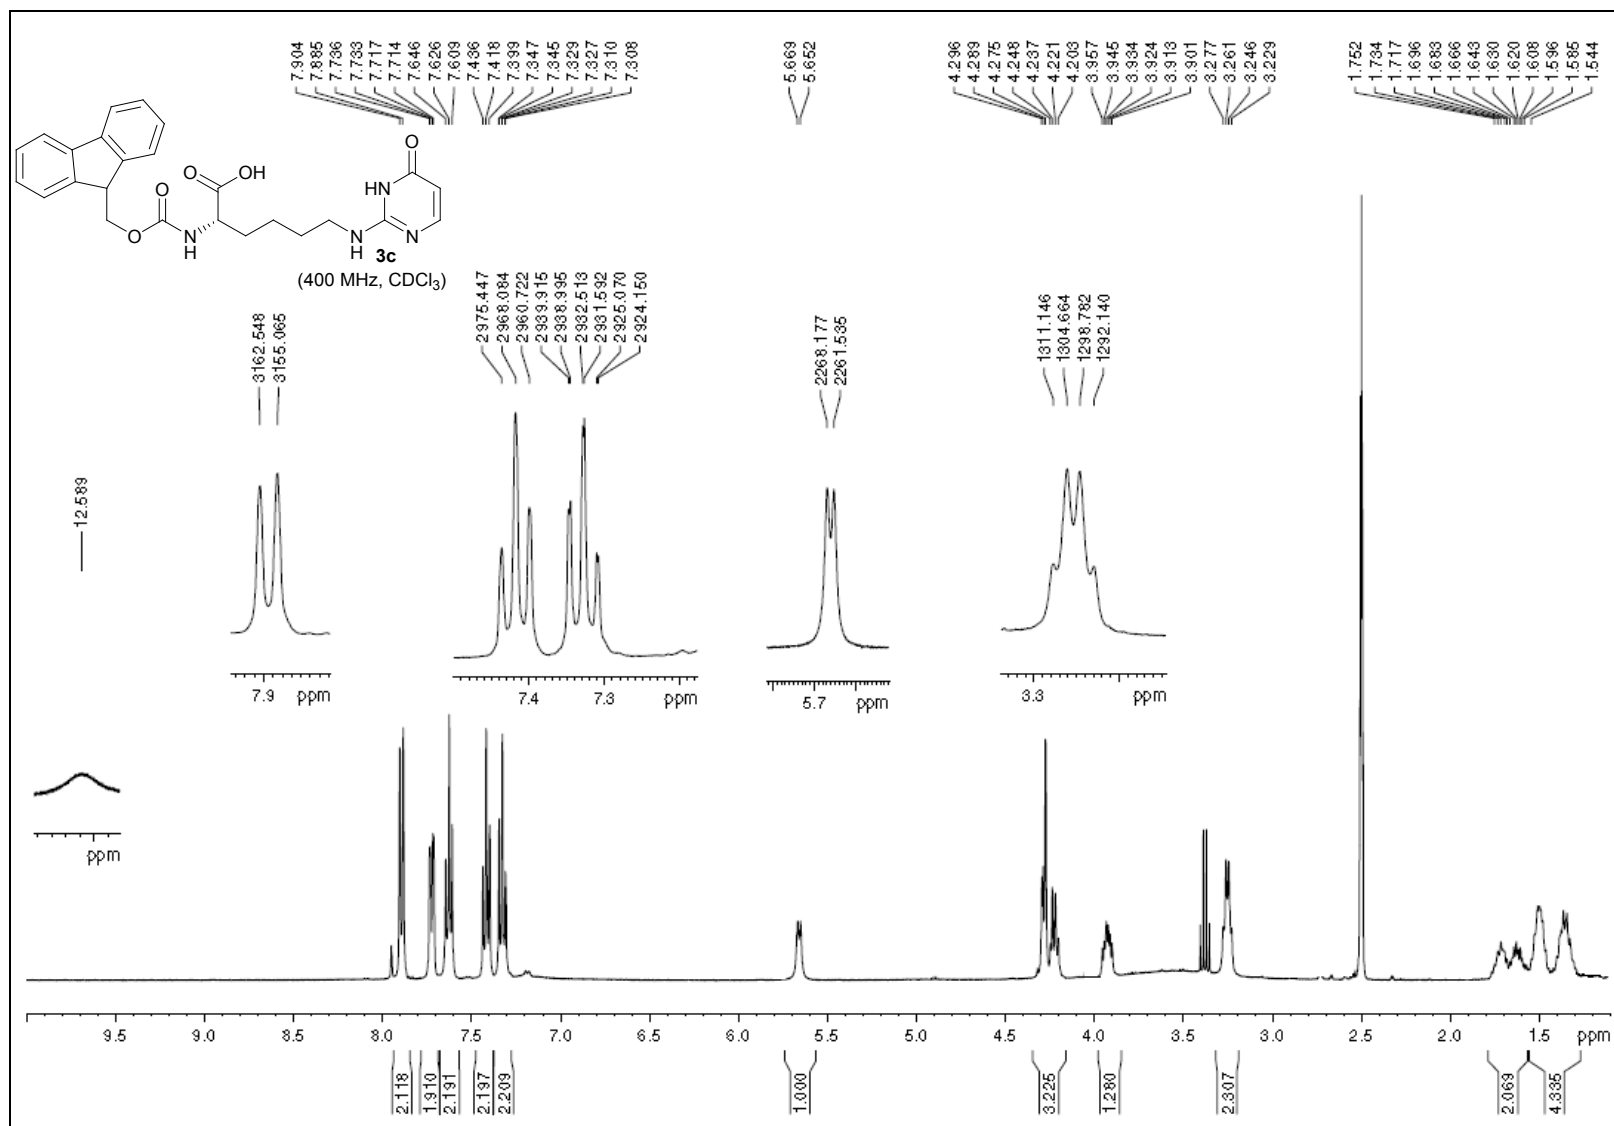

<sup>13</sup>C-NMR of compound **3c**

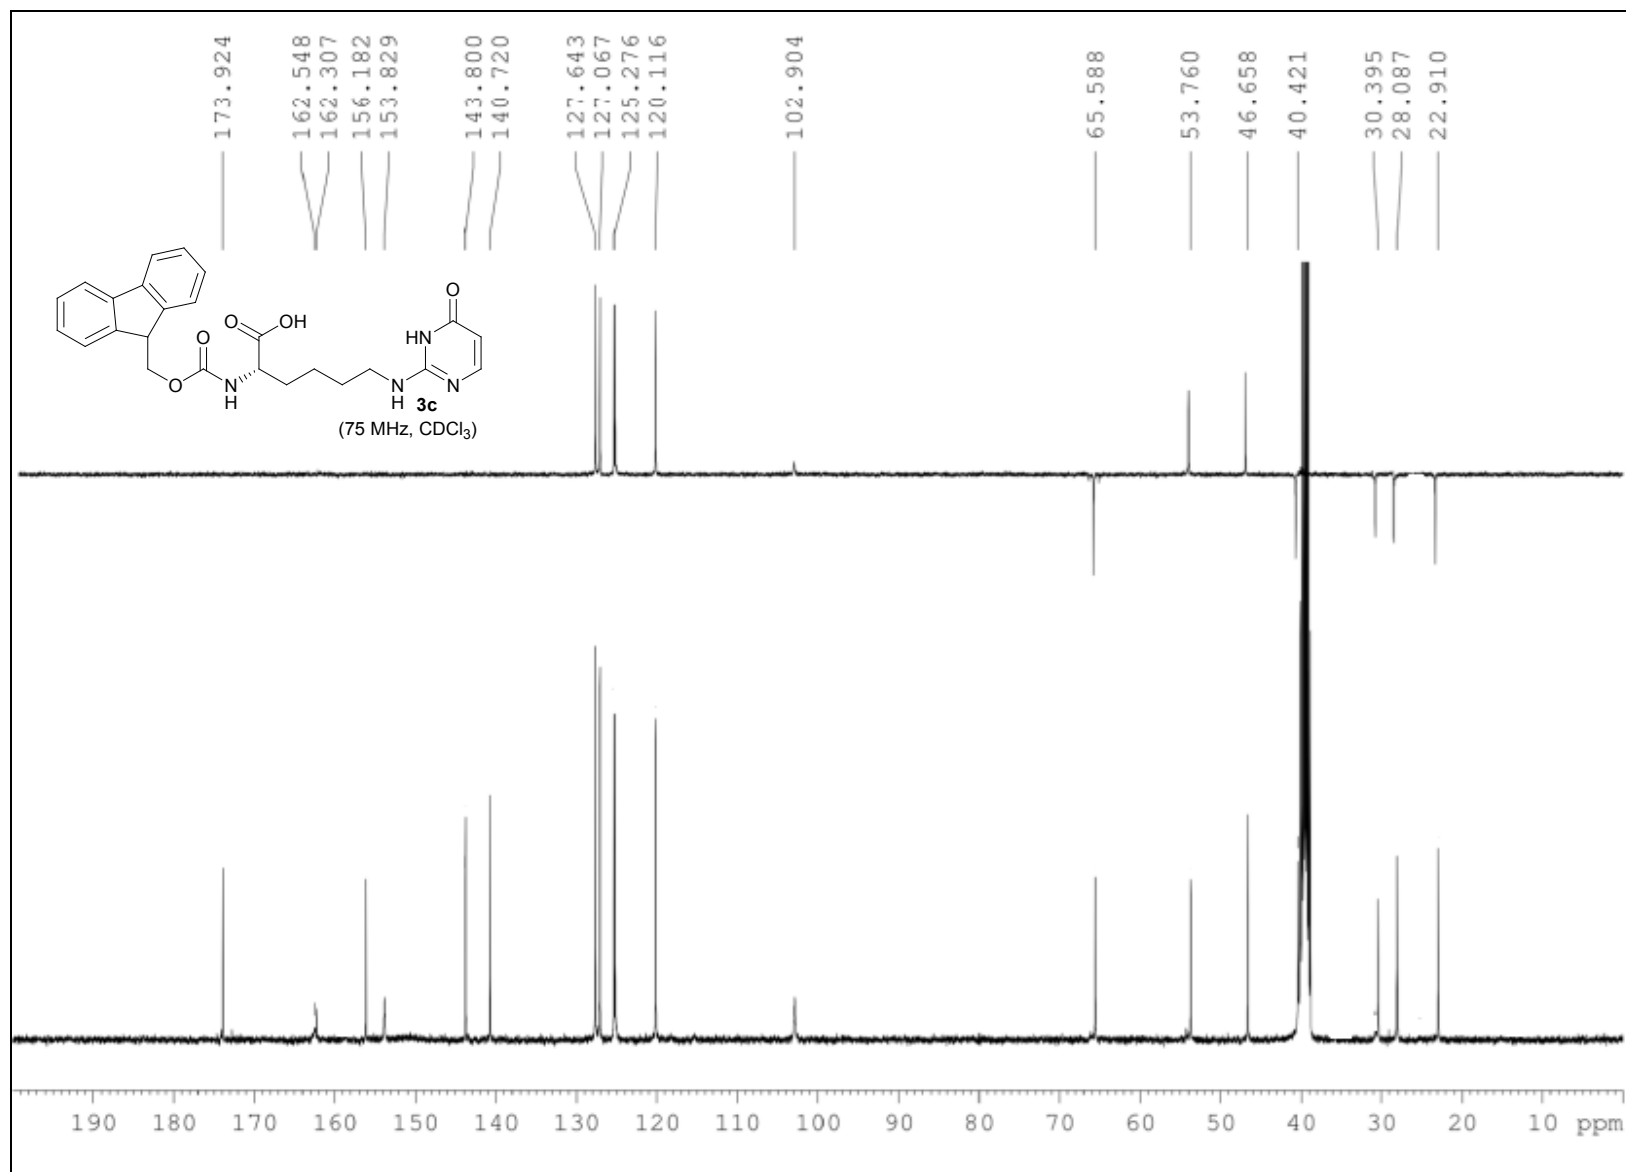

Supplement: c4ob02235a1.pdf [file c4ob02235a1.pdf]
